# Supplementary material for: N 6‐Isopentenyladenosine in RNA Determines the Cleavage Site of Endonuclease Deoxyribozymes
Source: PubMed Central journal article supplement — Angew Chem Int Ed Engl. 2020 Aug 20;59(42):18627–31. doi: 10.1002/anie.202006218 (PMC7589339; doi:10.1002/anie.202006218), 2020-08-20
Supplement: ANIE-59-18627-s001.pdf [file ANIE-59-18627-s001.pdf]

Supporting Information

***N*<sup>6</sup>-Isopentenyladenosine in RNA Determines the Cleavage Site of  
Endonuclease Deoxyribozymes**

*Anam Liaqat, Carina Stiller, Manuela Michel, Maksim V. Sednev, and Claudia Höbartner\**

anie\_202006218\_sm\_miscellaneous\_information.pdf

## SUPPORTING INFORMATION

## Table of Contents

|                                                                                      |    |
|--------------------------------------------------------------------------------------|----|
| 1. Materials and Methods.....                                                        | 2  |
| 2. Synthetic procedures for i <sup>6</sup> A phosphoramidite.....                    | 2  |
| 3. Synthesis and Labeling of RNA .....                                               | 6  |
| 4. In vitro selection .....                                                          | 7  |
| 5. Deep sequencing of selection libraries .....                                      | 8  |
| 6. Kinetics characterization of deoxyribozymes .....                                 | 8  |
| 7. Supporting Tables .....                                                           | 9  |
| Table S1. Sequences of DNA oligonucleotides                                          |    |
| Table S2. Summary of NGS data analysis                                               |    |
| 8. Supporting Figures.....                                                           | 11 |
| Fig. S1. In vitro selection: scheme and progress                                     |    |
| Fig. S2. NGS library preparation                                                     |    |
| Fig. S3. Gel images and kinetic plots of AA DNA enzymes                              |    |
| Fig. S4. Gel images of AB08 with m <sup>6</sup> A RNA and i <sup>6</sup> A RNA       |    |
| Fig. S5. Enrichment of AB08 variants                                                 |    |
| Fig. S6. Gel images and kinetic plots of AB08 variants                               |    |
| Fig. S7. Gel images of AC17 and VMC10 with m <sup>6</sup> A and i <sup>6</sup> A RNA |    |
| Fig. S8. Gel images and kinetic plots of AC17 variants                               |    |
| Fig. S9 – Fig. S29 NMR and MS Spectra                                                |    |
| 9. Alignment of AB08 and AC17 variants used for Sequence logos .....                 | 28 |
| 10. References.....                                                                  | 29 |

## Experimental Procedures

## 1. Materials and Methods

Unmodified DNA oligonucleotides were purchased from Microsynth and purified by denaturing PAGE (10-20% polyacrylamide) prior to use. Modified DNA (including primers) and RNA oligonucleotides were prepared in house by solid phase synthesis by using standard phosphoramidite chemistry. Solid supports for solid phase synthesis and unmodified DNA and 2'-O-TOM-protected RNA phosphoramidites were purchased from Sigma Proligo, ChemGenes, or Glen Research. Fluorescein-thiosemicarbazide and 6-carboxyfluorescein succinimidyl ester (NHS-fluorescein) were purchased from Sigma. 6-FAM-azide and deoxyribonucleotide triphosphate (dNTPs) were from Jena Bioscience. T4 Polynucleotide Kinase (PNK), T4 DNA Ligase and DreamTaq polymerase were purchased from Thermo Fisher Scientific.

## 2. Synthetic procedures

## General Information

All reaction were performed under nitrogen atmosphere. The obtained products were stored at 4 °C. The chemicals used for the reactions were purchased 'Pro analysis'- or 'For synthesis' quality and used without additional purification. Solvents for column chromatography were used in technical quality and distilled prior to use. Dry solvents (dichloromethane, acetonitrile, THF, DMF) were obtained from solvent purification system (SPS). Methanol was pre-dried over molecular sieves and further dried with magnesium turnings. Column chromatography was performed on silica gel (Kieselgel 60, Merck, 0.063 – 0.200 mm). TLC was performed on Alugram DIL G/UV254 (Machery-Nagel, UV visualization, 254 nm). NMR spectra were recorded on a Bruker Avance III HD 400 spectrometer. Chemical shifts were measured relative to the residual solvent signals as internal standards (in ppm; CDCl<sub>3</sub>: <sup>1</sup>H = 7.26, <sup>13</sup>C = 77.16, DMSO: <sup>1</sup>H = 2.50, <sup>13</sup>C = 39.52). ESI-MS of the products and the oligonucleotides were recorded on a Bruker micrOTOF-Q III spectrometer.

## SUPPORTING INFORMATION

Synthesis of i<sup>6</sup>A phosphoramidite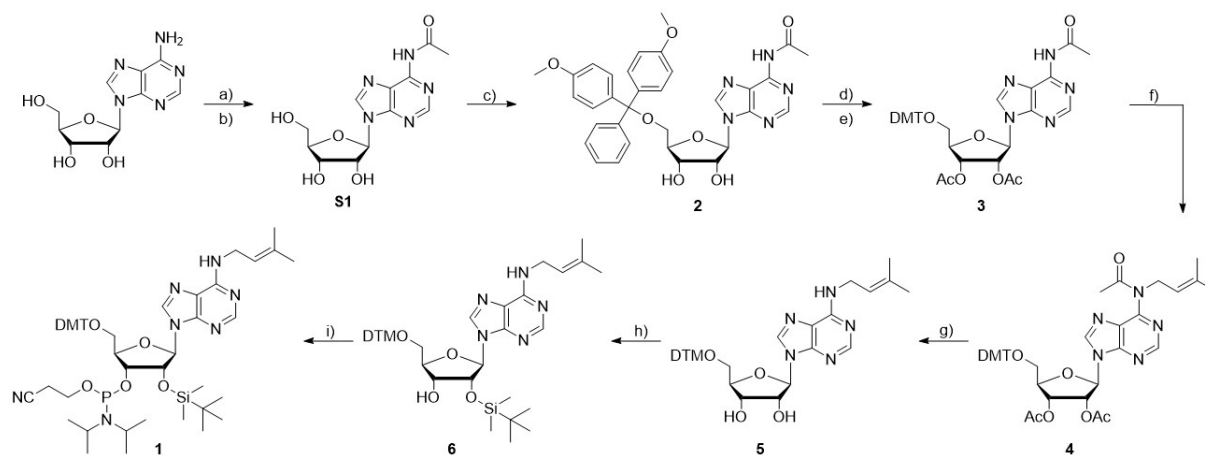

a) TMS-Cl, pyridine, 18 h, 0 °C - r.t. b) MeCN, AcCl, 1 h 0 °C - r.t. c) DMT-Cl, pyridine, 2 h, r.t. d) Ac<sub>2</sub>O, pyridine, 1.5 h, r.t. e) imidazole, MeOH, 2 h, r.t. f) K<sub>2</sub>CO<sub>3</sub>, isopentenyl bromide, DMF, 20 h, 50 °C g) MeNH<sub>2</sub> in EtOH, 16 h, r.t. h) TBDMS-Cl, AgNO<sub>3</sub>, THF/pyridine, 19 h, r.t. i) Me<sub>2</sub>NET, CEP-Cl, 2.5 h, r.t.

The synthesis of i<sup>6</sup>A-phosphoramidite building block **1** started with acetyl protection of the N<sup>6</sup> amino group of adenosine, followed by protection of the 5'-OH group with 4,4'-dimethoxytrityl chloride to produce compound **2**, following published procedures.<sup>[1]</sup> Compound **2** was treated with Ac<sub>2</sub>O to give N<sup>6</sup>-acetyl-2',3'-O-diacetyl-5'-O-(4,4'-dimethoxytrityl)adenosine (**3**).<sup>[2]</sup> The isopentenyl group was regioselectively introduced at N<sup>6</sup> using isopentenyl bromide and K<sub>2</sub>CO<sub>3</sub> to produce key intermediate **4**, following a procedure previously reported for N<sup>6</sup>-alkylation of tetraacetyladenosine.<sup>[2]</sup> The acetyl groups were then removed under basic conditions to give **5**,<sup>[3]</sup> followed by treatment with TBDMS-Cl in the presence of silver nitrate.<sup>[4]</sup> The 2'-silylated compound **6** was then converted to the phosphoramidite **1**.

N<sup>6</sup>-Acetyl-5'-O-(4,4'-dimethoxytrityl)adenosine (**2**)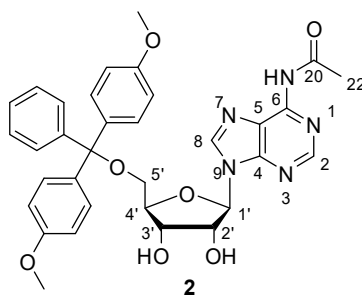

Starting from adenosine, N<sup>6</sup>-acetyl-5'-O-DMT-adenosine (**2**) was produced following the published procedure.<sup>[1]</sup> The analytical parameters coincided with the ones reported by Pitsch et al., but the assignments of H2 and H8 need to be revised, as described here.

**HR-MS (ESI<sup>+</sup>):** Exact mass calculated for C<sub>33</sub>H<sub>33</sub>N<sub>5</sub>NaO<sub>7</sub> [M+Na]<sup>+</sup>: 634.22722, found: 634.22888.

**<sup>1</sup>H NMR** (400 MHz, CDCl<sub>3</sub>) δ (ppm) = 8.63 (s, 1H, **2-H**), 8.22 (s, 1H, **8-H**), 7.30 – 7.21 (m, 2H, DMT), 7.20 – 7.14 (m, 7H, DMT), 6.77 – 6.69 (m, 4H, DMT), 6.03 (d, *J* = 5.7 Hz, 1H, 1'-H), 4.86 (dd, *J* = 5.7, 5.1 Hz, 1H, 2'-H), 4.46 (dd, *J* = 5.1, 2.3 Hz, 1H, 3'-H), 4.44 – 4.40 (m, 1H, 4'-H), 3.76 (d, *J* = 0.8 Hz, 6H, 2x CH<sub>3</sub>), 3.44 (dd, *J* = 10.6, 3.5 Hz, 1H, 5'-H), 3.30 (dd, *J* = 10.6, 3.4 Hz, 1H, 5'-H), 2.61 (s, 3H, Acetyl-CH<sub>3</sub>).

**<sup>13</sup>C NMR** (101 MHz, CDCl<sub>3</sub>) δ (ppm) = 170.38 (C<sub>q</sub>, Acetyl), 158.68, 158.65 (C<sub>q</sub>, C-OCH<sub>3</sub>, DMT), 152.11 (C-2), 150.60 (C-4), 149.45 (C-6), 144.41 (C<sub>q</sub>, DMT), 141.40 (C-8), 135.54, 135.53 (C<sub>q</sub>, DMT), 130.11 (DMT), 130.06 (DMT), 128.10 (DMT), 127.99 (DMT), 127.08 (DMT), 122.14 (C-5), 113.27 (DMT), 90.73 (C-1'), 86.76 (C<sub>q</sub>, C-O, DMT), 86.01 (C-4'), 75.88 (C-2'), 72.41 (C-3'), 63.55 (C-5'), 55.35 (2xCH<sub>3</sub>, DMT), 25.83 (C-22, Acetyl-CH<sub>3</sub>).

## SUPPORTING INFORMATION

*N*<sup>6</sup>-Acetyl-2',3'-O-diacetyl-5'-O-(4,4'-dimethoxytrityl)adenosin (**3**)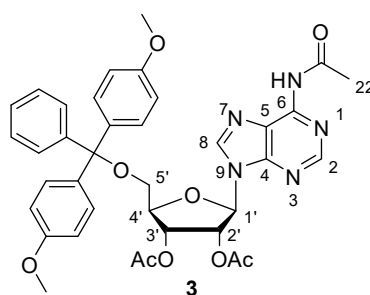

*N*<sup>6</sup>-acetyl-5'-O-(4,4'-dimethoxytrityl)adenosine (**2**, 230 mg, 376  $\mu$ mol, 1 eq) was dissolved in dry pyridine (1.5 mL), treated with Ac<sub>2</sub>O (190  $\mu$ L, 1.90 mmol, 5.05 eq) and stirred for 1.5 h at room temperature. After addition of EtOH (2.5 mL) the solvent was removed under reduced pressure. The reaction mixture was diluted with ethylacetate (20 mL) and washed with brine and the organic phase was dried over Na<sub>2</sub>SO<sub>4</sub>. After evaporation of the solvent under reduced pressure, the product (**3**, 208 mg, 299  $\mu$ mol, 79%) was obtained as a colorless foam.

Chemical formula: C<sub>37</sub>H<sub>37</sub>N<sub>5</sub>O<sub>9</sub>, Molecular weight: 695.73 g·mol<sup>-1</sup>

**HR-MS (ESI<sup>+</sup>)**: Exact mass calculated for C<sub>37</sub>H<sub>37</sub>N<sub>5</sub>NaO<sub>9</sub> [M+Na]<sup>+</sup>: 718.24835, found: 718.24876.

**<sup>1</sup>H NMR** (400 MHz, CDCl<sub>3</sub>)  $\delta$  (ppm) = 8.64 (s, 1H, 2-H), 8.13 (s, 1H, 8-H), 7.43 – 7.39 (m, 2H, DMT), 7.34 – 7.23 (m, 6H, DMT), 7.24 – 7.19 (m, 1H, DMT), 6.84 – 6.75 (m, 4H, DMT), 6.32 (d, *J* = 6.6 Hz, 1H, 1'-H), 6.11 (dd, *J* = 6.6, 5.3 Hz, 1H, 2'-H), 5.69 (dd, *J* = 5.3, 3.0 Hz, 1H, 3'-H), 4.36 (q, *J* = 3.2 Hz, 1H, 4'-H), 3.78 (t, *J* = 0.7 Hz, 6H, 2 x CH<sub>3</sub>), 3.51 (dd, *J* = 10.7, 3.1 Hz, 1H, 5'-H), 3.46 (dd, *J* = 10.7, 3.5 Hz, 1H, 5'-H), 2.59 (d, *J* = 1.5 Hz, 3H, Acetyl-CH<sub>3</sub>), 2.13 (s, 3H, Acetyl-CH<sub>3</sub>), 2.05 (s, 3H, Acetyl-CH<sub>3</sub>).

**<sup>13</sup>C NMR** (101 MHz, CDCl<sub>3</sub>)  $\delta$  (ppm) = 170.28 (C<sub>q</sub>, Acetyl), 169.87 (C<sub>q</sub>, Acetyl), 169.54 (C<sub>q</sub>, Acetyl), 158.81 (C<sub>q</sub>, C-OCH<sub>3</sub>, DMT), 152.83 (C-2), 151.43 (C-4), 149.36 (C-6), 144.19 (C<sub>q</sub>, DMT), 141.08 (C-8), 135.34, 135.30 (C<sub>q</sub>, DMT), 130.29, 130.27 (DMT), 128.34 (DMT), 128.16 (DMT), 127.27 (DMT), 121.97 (C-5), 113.42 (DMT), 87.27 (C<sub>q</sub>, C-O, DMT), 85.16 (C-1'), 82.79 (C-4'), 73.41 (C-2'), 71.83 (C-3'), 63.12 (C-5'), 55.39 (2x CH<sub>3</sub>, DMT), 25.81 (C-22, CH<sub>3</sub>, Acetyl), 20.82 (CH<sub>3</sub>, Acetyl), 20.56 (CH<sub>3</sub>, Acetyl).

*N*<sup>6</sup>-Acetyl-2',3'-O-diacetyl-5'-O-(4,4'-dimethoxytrityl)-*N*<sup>6</sup>-isopentenyladenosine (**4**)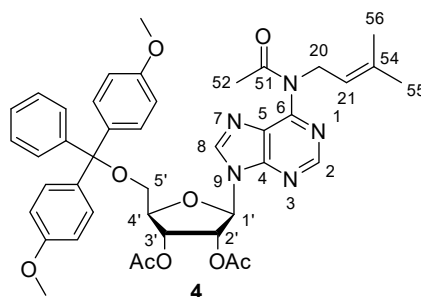

*N*<sup>6</sup>-Acetyl-2',3'-O-diacetyl-5'-O-(4,4'-dimethoxytrityl)adenosine (**3**, 1.0 g, 1.44 mmol, 1 eq) in dry DMF (15 mL) was treated with K<sub>2</sub>CO<sub>3</sub> (1.39 g, 10.1 mmol, 7 eq) and isopentenyl bromide (1.29 g, 996  $\mu$ L, 8.62 mmol, 6 eq) and stirred for 20 h at 50 °C. The solution was allowed to cool down to room temperature, diluted with ethyl acetate (42 mL) and washed with brine. The organic phase was dried over Na<sub>2</sub>SO<sub>4</sub> and the solvent was removed under reduced pressure. The residual was purified by column chromatography (DCM + 1% NEt<sub>3</sub> → DCM:EtOH = 99:1 + 1% NEt<sub>3</sub>) to yield the product (**4**, 590 mg, 54%) as a slightly yellow foam. A significant fraction of unreacted starting material was recovered (**3**, 225 mg, 22%).

Chemical formula: C<sub>42</sub>H<sub>45</sub>N<sub>5</sub>O<sub>9</sub>, Molecular weight: 763.9 g·mol<sup>-1</sup>

**HR-MS (ESI<sup>+</sup>)**: Exact mass calculated for C<sub>42</sub>H<sub>45</sub>N<sub>5</sub>NaO<sub>9</sub> [M+Na]<sup>+</sup>: 786.31095, found: 786.31438.

**<sup>1</sup>H NMR** (400 MHz, CDCl<sub>3</sub>)  $\delta$  (ppm) = 8.72 (s, 1H, 2-H), 8.20 (s, 1H, 8-H), 7.43 – 7.39 (m, 2H, DMT), 7.33 – 7.29 (m, 4H, DMT), 7.26 (s, 2H, DMT), 7.24 – 7.18 (m, 1H, DMT), 6.84 – 6.78 (m, 4H, DMT), 6.35 (d, *J* = 6.5 Hz, 1H, 1'-H), 6.11 (dd, *J* = 6.4, 5.3 Hz, 1H, 2'-H), 5.71 (dd, *J* = 5.3, 3.2 Hz, 1H, 3'-H), 5.23 (ddt, *J* = 6.6, 5.3, 1.4 Hz, 1H, 21-H), 4.84 (d, *J* = 6.7 Hz, 2H, CH<sub>2</sub>, 20-H), 4.37 (q, *J* = 3.3 Hz, 1H, 4'-H), 3.78 (d, *J* = 1.6 Hz, 6H, 2xCH<sub>3</sub>, DMT), 3.52 (dd, *J* = 10.7, 3.1 Hz, 1H, 5'-H), 3.46 (dd, *J* = 10.8, 3.6 Hz, 1H, 5'-H), 2.27 (s, 3H, CH<sub>3</sub>, H-52), 2.14 (s, 3H, CH<sub>3</sub>, Acetyl), 2.07 (s, 3H, CH<sub>3</sub>, Acetyl), 1.60 (d, *J* = 1.3 Hz, 3H), 1.59 (d, *J* = 1.3 Hz, 3H, H-55, H-56).

**<sup>13</sup>C NMR** (101 MHz, CDCl<sub>3</sub>)  $\delta$  (ppm) = 171.41 (C<sub>q</sub> C-51), 169.84 (C<sub>q</sub> C-46), 169.52 (C<sub>q</sub> C-45), 158.80 (C<sub>q</sub>, C-OCH<sub>3</sub>, DMT), 153.85 (C-6), 153.08 (C-4), 152.35 (C-2), 144.20 (C<sub>q</sub>, DMT), 141.89 (C-8), 135.96 (C<sub>q</sub>, C-54), 135.37, 135.33 (C<sub>q</sub>, DMT), 130.26 (DMT), 128.30 (DMT), 128.13 (DMT), 127.40 (C-5), 127.23 (DMT), 120.28 (C-21), 113.41 (DMT), 87.23 (C-22), 85.37 (C-1'), 82.65 (C-4'), 73.30 (C-2'), 71.68 (C-3'), 63.03 (C-5'), 55.37 (2xCH<sub>3</sub>, DMT), 45.79 (C-20), 25.78 (C-55, CH<sub>3</sub>), 24.46 (C-52, CH<sub>3</sub>), 20.81, 20.59 (C-48, C-49, 2xCH<sub>3</sub>, Acetyl), 18.07 (C-56, CH<sub>3</sub>).

## SUPPORTING INFORMATION

*N*<sup>6</sup>-Isopentenyl-5'-O-(4,4'-dimethoxytrityl)adenosine (5)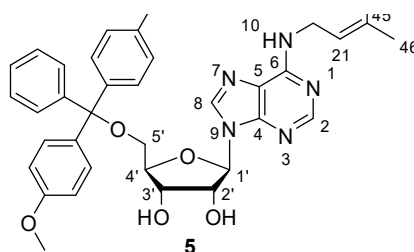

*N*<sup>6</sup>-Acetyl-2',3'-O-diacetyl-5'-O-(4,4'-dimethoxytrityl)-*N*<sup>6</sup>-isopentyladenosine (**4**, 500 mg, 655 μmol, 1 eq) in MeOH (6 mL) was treated with methylamine in EtOH (33%, 5.7 mL, 45.8 mmol, 70 eq) and stirred at room temperature overnight. After evaporation of the solvent, the residue was purified by column chromatography (DCM + 1% NEt<sub>3</sub> → DCM:EtOH = 99:1 + 1% NEt<sub>3</sub> → DCM:EtOH = 97:3 + 1% NEt<sub>3</sub>) to yield the product (293 mg, 459 μmol, 70%) as a colorless foam.

Chemical formula: C<sub>36</sub>H<sub>39</sub>N<sub>5</sub>O<sub>6</sub>, Molecular weight: 637.7 g·mol<sup>-1</sup>

**HR-MS (ESI)<sup>+</sup>**: Exact mass calculated for C<sub>36</sub>H<sub>40</sub>N<sub>5</sub>O<sub>6</sub> [M+H]<sup>+</sup>: 638.29731, found: 638.29719

**<sup>1</sup>H NMR** (400 MHz, CDCl<sub>3</sub>) δ (ppm) = 8.34 (s, 1H, 2-H), 8.02 (s, 1H, 8-H), 7.28 – 7.24 (m, 2H, DMT), 7.20 – 7.14 (m, 7H, DMT), 6.76 – 6.70 (m, 4H, DMT), 5.94 (d, *J* = 6.0 Hz, 1H, 1'-H), 5.79 (s, 1H, NH), 5.41 – 5.34 (m, 1H, 21-H), 4.76 (dd, *J* = 6.1, 5.1 Hz, 1H, 2'-H), 4.42 (td, *J* = 3.3, 1.8 Hz, 1H, 4'-H), 4.37 (dd, *J* = 5.1, 1.9 Hz, 1H, 3'-H), 4.22 (s, 2H, CH<sub>2</sub>, 20-H), 3.76 (d, *J* = 1.4 Hz, 6H, 2xCH<sub>3</sub>, DMT), 3.43 (dd, *J* = 10.5, 3.5 Hz, 1H, 5'-H), 3.22 (dd, *J* = 10.5, 3.4 Hz, 1H, 5'-H), 1.74 (dd, *J* = 4.0, 1.3 Hz, 6H, 2xCH<sub>3</sub>, 46-H, 47-H).

**<sup>13</sup>C NMR** (101 MHz, CDCl<sub>3</sub>) δ (ppm) = 158.62 (C<sub>q</sub>, C-OCH<sub>3</sub>), 154.87 (C-6), 152.70 (C-2), 147.89 (C-4), 144.40 (C<sub>q</sub>, DMT), 137.92 (C-8), 137.36 (C-45), 135.70, 135.50 (C<sub>q</sub>, DMT), 130.09 (DMT), 130.04 (DMT), 128.11 (DMT), 127.96 (DMT), 127.00 (DMT), 120.29 (C-5), 119.96 (C-22), 113.24 (DMT), 91.23 (C-1'), 86.71, 86.61 (C-4', C<sub>q</sub>, C-O), 76.48 (C-2'), 73.15 (C-3'), 63.73 (C-5'), 55.32 (CH<sub>3</sub>, DMT), 38.77 (C-21), 25.83 (CH<sub>3</sub>, C-46), 18.17 (CH<sub>3</sub>, C-47).

*N*<sup>6</sup>-Isopentenyl-5'-O-(4,4'-dimethoxytrityl)-2'-O-(tert-butyldimethylsilyl)adenosine (6)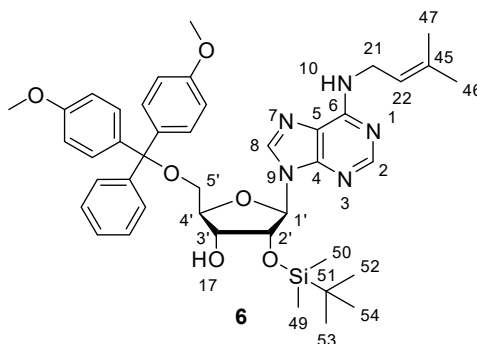

To *N*<sup>6</sup>-isopentenyl-5'-O-(4,4'-dimethoxytrityl)adenosine (**5**, 335 mg, 525 μmol, 1 eq) in dry THF/pyridine (1:1, 4 mL) AgNO<sub>3</sub> (134 mg, 788 μmol, 1.5 eq) and TBDMS-Cl (87.1 mg, 578 μmol, 1.1 eq) were added and stirred for 19 h at room temperature. The reaction was stopped with MeOH (4 mL) and filtered over celite. The filtrate was evaporated to dryness under reduced pressure. The mixture of 2' and 3' silylated isomers was repeatedly separated by column chromatography (hexane:ethylacetate = 4:1 + 1% NEt<sub>3</sub> → 3:1 → 2:1) to yield the pure isomer compound **6** (182 mg, 242 μmol, 46%) as a colorless foam.

Chemical formula: C<sub>42</sub>H<sub>53</sub>N<sub>5</sub>O<sub>6</sub>Si, Molecular weight: 752.0 g·mol<sup>-1</sup>

**HR-MS (ESI)<sup>+</sup>**: Exact mass calculated for C<sub>42</sub>H<sub>54</sub>N<sub>5</sub>O<sub>6</sub>Si [M+H]<sup>+</sup>: 752.38379, found: 752.38394

**<sup>1</sup>H NMR** (400 MHz, CDCl<sub>3</sub>) δ (ppm) = 8.31 (s, 1H, 2-H), 7.94 (s, 1H, 8-H), 7.47 – 7.43 (m, 2H, DMT), 7.36 – 7.31 (m, 4H, DMT), 7.27 (s, 2H, DMT), 7.23 – 7.18 (m, 1H, DMT), 6.84 – 6.77 (m, 4H, DMT), 6.01 (d, *J* = 5.5 Hz, 1H, 1'-H), 5.61 (s, 1H, NH), 5.38 (tdt, *J* = 7.1, 2.9, 1.4 Hz, 1H, 22-H), 4.99 (t, *J* = 5.3 Hz, 1H, 2'-H), 4.33 (dt, *J* = 5.2, 3.7 Hz, 1H, 3'-H), 4.24 (q, *J* = 3.5 Hz, 1H, 4'-H), 4.22 (s, 2H, CH<sub>2</sub>, 21-H), 3.78 (d, *J* = 1.2 Hz, 6H, 2xCH<sub>3</sub>, DMT), 3.51 (dd, *J* = 10.6, 3.3 Hz, 1H, 5'-H), 3.37 (dd, *J* = 10.6, 4.0 Hz, 1H, 5'-H), 2.72 (d, *J* = 4.0 Hz, 1H, OH), 1.78 – 1.73 (m, 6H, 2xCH<sub>3</sub>, 46-H, 47-H), 1.26 (t, *J* = 7.1 Hz, 1H), 0.84 (s, 9H, 3xCH<sub>3</sub>, 52-H, 53-H, 54-H), -0.02 (s, 3H, CH<sub>3</sub>, H-49), -0.14 (s, 3H, CH<sub>3</sub>, 50-H).

**<sup>13</sup>C NMR** (101 MHz, CDCl<sub>3</sub>) δ (ppm) = 158.66 (C<sub>q</sub>, C-OCH<sub>3</sub>), 154.73 (C-6), 153.43 (C-2), 149.28 (C-4), 144.75 (C<sub>q</sub>, DMT), 138.56 (C-8), 137.13 (C<sub>q</sub>, C-45), 135.83 (C<sub>q</sub>, DMT), 130.23 (DMT), 128.30 (DMT), 128.03 (DMT), 127.05 (DMT), 120.32 (C-5), 120.21 (C-22), 113.32 (DMT), 88.23 (C-1'), 86.71 (C<sub>q</sub>, DMT), 84.18 (C-4'), 75.73 (C-2'), 71.72 (C-3'), 63.58 (C-5'), 55.36 (2xCH<sub>3</sub>, DMT), 38.85 (C-21), 25.85 (C-46), 25.73 (C-52, C-53, C-54), 18.17 (C-47), -4.82, -5.11 (C-49, C-50).

## SUPPORTING INFORMATION

***N*<sup>6</sup>-Isopentenyl-5'-O-(4,4'-dimethoxytrityl)-2'-O-(*tert*-butyldimethylsilyl)adenosine 3' cyanoethyl *N,N*-diisopropyl phosphoramidite (**1**)**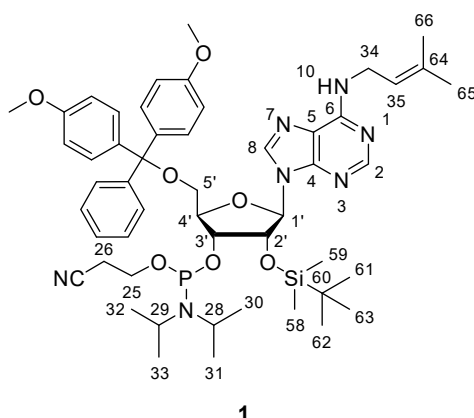

*N*<sup>6</sup>-Isopentenyl-5'-O-DMT-2'-O-TBDMS-adenosine (**6**, 70 mg, 93.1 μmol, 1 eq) was dissolved in dry DCM (1 mL) and Me<sub>2</sub>NET (101 μL, 931 μmol, 10 eq) and CEP-Cl (33.0 mg, 140 μmol, 1.5 eq) were added. After stirring for 2.5 h at room temperature, the solvent was removed under reduced pressure. The residue was purified by column chromatography (ethylacetate:hexane = 2:1 + 1% NEt<sub>3</sub>) to yield compound **1** (79 mg, 83.0 μmol, 89%).

Chemical formula: C<sub>51</sub>H<sub>70</sub>N<sub>7</sub>O<sub>7</sub>PSi, Molecular weight: 952.22 g·mol<sup>-1</sup>

**HR-MS (ESI)\*:** Exact mass calculated for C<sub>51</sub>H<sub>71</sub>N<sub>7</sub>O<sub>7</sub>PSi [M+H]<sup>+</sup>: 952.49164, found: 952.49298

**<sup>1</sup>H NMR** (400 MHz, CDCl<sub>3</sub>) δ (ppm) = 8.29 (s, 1H, 2-H), 8.27 (s, 1H, 2-H diast.), 7.97 (s, 1H, 8-H), 7.94 (s, 1H, 8-H diast.), 7.49 – 7.42 (m, 4H, DMT), 7.38 – 7.31 (m, 7H, DMT), 7.31 – 7.21 (m, 6H, DMT), 7.24 – 7.17 (m, 2H, DMT), 6.84 – 6.77 (m, 8H, DMT), 6.00 (d, *J* = 6.5 Hz, 1H, 1'-H), 5.96 (d, *J* = 6.1 Hz, 1H, 1'-H diast.), 5.58 (s, 2H, NH), 5.38 (dddd, *J* = 6.8, 5.4, 3.2, 1.5 Hz, 2H, 35-H), 5.07 (ddd, *J* = 8.6, 6.3, 4.6 Hz, 2H, 2'-H), 4.39 (m, 2H, 3'-H, 4'-H), 4.32 (q, *J* = 4.0 Hz, 1H, 4'-H), 4.21 (s, 4H, CH<sub>2</sub>, 34-H), 4.01 – 3.92 (m, 1H, CH<sub>2</sub>, 25-H), 3.88 (ddt, *J* = 10.3, 8.3, 6.7 Hz, 1H, CH<sub>2</sub>, 25-H), 3.78 (d, *J* = 1.3 Hz, 7H, 2xCH<sub>3</sub>, DMT), 3.78 (d, *J* = 0.6 Hz, 6H, 2xCH<sub>3</sub>, DMT diast.), 3.71 – 3.62 (m, 1H, CH<sub>2</sub>, 25-H diast.), 3.59 (dq, *J* = 10.2, 3.2 Hz, 4H, 25-H, 5'-H, 28-H, 29-H), 3.54 (dd, *J* = 10.7, 4.0 Hz, 1H, 5'-H diast.), 3.32 (dd, *J* = 9.8, 3.4 Hz, 1H, 5'-H), 3.28 (dd, *J* = 9.9, 3.4 Hz, 1H, 5'-H), 2.65 (td, *J* = 6.5, 4.4 Hz, 2H, CH<sub>2</sub>, 26-H), 2.30 (td, *J* = 6.7, 1.9 Hz, 1H, CH<sub>2</sub>, 26-H diast.), 1.76 (d, *J* = 1.3 Hz, 6H, 2xCH<sub>3</sub>, 65-H, 66-H), 1.74 (d, *J* = 1.3 Hz, 5H, 2xCH<sub>3</sub>, 65-H, 66-H diast.), 1.20 – 1.02 (m, 21H, 4xCH<sub>3</sub>, 30-H, 31-H, 32-H, 33-H), 0.77 (s, 8H, 3xCH<sub>3</sub>, 61-H, 62-H, 63-H), 0.76 (s, 8H, 3xCH<sub>3</sub>, 61-H, 62-H, 63-H diast.), -0.03 (s, 2H, CH<sub>3</sub>, 58-H), -0.06 (s, 3H, CH<sub>3</sub>, 58-H diast.), -0.19 (s, 2H, CH<sub>3</sub>, 59-H), -0.21 (s, 3H, CH<sub>3</sub>, 59-H diast.).

**<sup>13</sup>C NMR** (101 MHz, CDCl<sub>3</sub>) δ (ppm) = 158.64 (C<sub>q</sub>-OMe, DMT), 154.72 (C-6), 153.30 (C-2), 149.20 (C-4), 144.79, 144.69 (C<sub>q</sub>, DMT), 139.02 (C-8), 137.10 (C.64), 135.97, 135.93, 135.80, 135.76 (C<sub>q</sub>, DMT), 130.32, 130.27, 130.23 (C-DMT), 128.41, 128.29 (C-DMT), 128.02, 128.00 (C-DMT), 127.03 (C-DMT), 120.47 (C-5), 120.22 (C-35), 117.80, 117.46 (CN), 113.30, 113.26 (C-DMT), 88.40, 88.13 (C-1'), 86.77, 86.63 (C<sub>q</sub>-O, DMT), 84.06, 83.81 (C-4'), 75.13, 75.11, 74.59, 74.54 (C-2'), 73.56, 73.46, 73.01, 72.86 (C-3'), 63.55, 63.38 (C-5'), 59.08, 58.91, 57.93, 57.72 (C-25), 55.37, 55.35 (O-CH<sub>3</sub>, DMT), 43.58, 43.45, 43.12, 43.00 (C-28, C-29), 38.76 (C-34), 25.84, 25.80, 25.76 (C-61, C-62, C-63), 24.92, 24.85, 24.78, 24.67 (C-30, C-31, C-32, C-33), 20.62, 20.56, 20.22, 20.15 (C-26), 18.16, 18.10, 18.04 (C-65, C-66), -4.58, -4.60, -5.00 (C58, C-59).

**<sup>31</sup>P NMR** (162 MHz, CDCl<sub>3</sub>) δ (ppm) = 150.81, 148.84.

### 3. Synthesis and Labeling of RNA

The following solutions were used for automated solid-phase synthesis: 100 mM solutions in dry acetonitrile of the phosphoramidites, 0.25 M ethylthiotetrazole (ETT, activator) in dry acetonitrile, 3% dichloro acetic acid in 1,2-dichloroethane (deprotection), 0.5 M DMAP in acetonitrile (Cap A), acetic anhydride/sym-collidine/acetonitrile = 20/30/50 (Cap B), 10 mM I<sub>2</sub> in acetonitrile/sym-collidine/H<sub>2</sub>O = 10/1/5 (oxidation). Oligonucleotide synthesis was carried out at 0.6 μmol scale. Forward primer for PCR was coupled with hexynyl group at 5' end and reverse primer was linked with a 12-nt tail via a non-extendable hexaethyleneglycol spacer. The coupling efficiencies were determined using absorbance of released dimethoxytrityl (DMT) cation and exceeded 98% for all syntheses. DNA oligonucleotides were deprotected using NH<sub>4</sub>OH and MeNH<sub>2</sub> at 55°C for 5 hours. For RNA oligonucleotides deprotection was performed in two steps using MeNH<sub>2</sub> in aqueous ethanol, followed by 1 M TBAF in THF. 3'-Amino modified RNA was synthesized on amino-on-solid support and deprotected using NH<sub>4</sub>OH and MeNH<sub>2</sub> in aqueous solution for 6 hours at 55°C, followed by TBAF in THF. Deprotected oligonucleotide samples were first desalted by size exclusion chromatography on 3×5 ml HiTrap columns (GE Healthcare), then purified by denaturing PAGE and analyzed via anion exchange HPLC and ESI-MS.

**Anion exchange chromatography** was performed on Dionex DNAPAc PA200 column, 2x250 mm, with 25 mM Tris.HCl pH 8.0, 6 M urea (buffer A) and 0.5 M NaClO<sub>4</sub> in 25 mM Tris.HCl pH 8.0, 6 M urea (buffer B), gradient: 0-48% B in 12 column volumes, flow rate 0.5 mL/min, 60°C. UV-detection at 260 nm.

**PAGE purification** was performed on 320x160x0.7mm denaturing polyacrylamide gels (10-20% acrylamide/ bisacrylamide 19:1, 7 M urea) with 1× TBE (89 mM Tris, 89 mM boric acid, 2 mM EDTA, pH=8.3) and run at 35 W power for 2 hours. Oligonucleotides were

## SUPPORTING INFORMATION

visualized using UV shadowing on TLC plate, excised from the gel, extracted by crush and soak into TEN buffer (10 mM Tris-HCl, pH = 8.0, 1 mM EDTA, 300 mM NaCl) and recovered by precipitation with ethanol.

### Labeling of 5'-alkyne functionalized oligonucleotides

Oligonucleotides with 5'-alkyne group were labeled with 6-FAM-azide using copper(I)-catalyzed alkyne-azide cycloaddition (CuAAC). Oligonucleotide (5 nmol in 5  $\mu$ L of H<sub>2</sub>O) was mixed with 3  $\mu$ L of DMSO/tBuOH (3:1 v/v) and 0.5  $\mu$ L of 6-FAM-azide (50 mM in DMSO/tBuOH 3:1). The solution of CuBr (100 mM) was freshly prepared in DMSO/tBuOH 3:1 and mixed with a solution of TBTA (100 mM) in a 1:2 ratio. From this solution, 1.5  $\mu$ L was added to the reaction mixture and incubated at 37°C for 3 hours in the dark. Afterwards, the sample was ethanol precipitated to remove excess fluorophore and labeled oligonucleotides were purified by PAGE.

### Labeling of 3'-amino functionalized oligonucleotides

Oligonucleotides with 3'-amino group were labeled with 6-carboxyfluorescein succinimidyl ester (NHS-fluorescein). Amino-modified RNA (2.5 nmol in 2.5  $\mu$ L of H<sub>2</sub>O) was dissolved in carbonate buffer (20  $\mu$ L, 100 mM, pH = 9.0) and solution of NHS-fluorescein in DMF (2.5  $\mu$ L, 30 mM) was added. The reaction mixture was incubated at 37°C for 2 hours in the dark. Labeled RNA was purified by denaturing PAGE.

### Labeling of native RNA 3'-ends

Unfunctionalized RNA was labeled at 3'-end with fluorescein-5-thiosemicarbazide by periodate oxidation method. RNA (5 nmol in 10  $\mu$ L of H<sub>2</sub>O) was mixed with sodium phosphate buffer (10  $\mu$ L, 100 mM, pH = 7.4) and freshly prepared solution of NaIO<sub>4</sub> (2.5  $\mu$ L, 100 mM). The reaction mixture was incubated at 37°C for 10 minutes. The reaction was quenched by Na<sub>2</sub>SO<sub>3</sub> (5  $\mu$ L, 100 mM) and incubated at 37°C for 5 minutes. To this reaction mixture, a solution of fluorescein-5-thiosemicarbazide (5  $\mu$ L, 10 mM) in DMF was added and the reaction was incubated at 37°C for 3 hours in the dark. Labeled product was purified by denaturing PAGE.

### 5'-Phosphorylation of RNA substrates

Phosphorylation at 5'end of RNA substrates was carried with T4 PNK enzyme. RNA (2-5 nmol) incubated with 10 $\times$  PNK buffer A (5  $\mu$ L, 500 mM Tris-HCl, 10 mM MgCl<sub>2</sub>, 50 mM DTT, 1 mM spermidine), ATP (5  $\mu$ L, 10 mM) and T4 PNK enzyme (5  $\mu$ L, 10 U/ $\mu$ L) at 37°C for 5 hours. The total volume of the reaction mixture was 50  $\mu$ L. Afterwards, RNA was extracted with phenol/ chloroform/isoamylalcohol mixture followed by ethanol precipitation.

## 4. In vitro selection

### Splint ligation of RNA substrate to deoxyribozyme selection pool

The RNA substrate was ligated with ssDNA pool using T4 DNA ligase in presence of complementary DNA splint. Deoxyribozyme pool (1.6 nmol), 5'-phosphorylated RNA and complementary splint were used in a molar proportion of 1: 1.5: 1.25 respectively in total volume of 12  $\mu$ L. To this mixture, 10 $\times$  annealing buffer (2  $\mu$ L, 40 mM Tris-HCl, 150 mM NaCl, 1 mM EDTA, pH = 8.0) was added and heated at 95°C for 4 minutes. The mixture was allowed to cool down to 25°C for 10 minutes. Afterwards, 10 $\times$  ligase buffer (2  $\mu$ L, 400 mM Tris-HCl, 100 mM MgCl<sub>2</sub>, 100 mM DTT, 5 mM ATP, pH = 7.8) and T4 DNA ligase (2  $\mu$ L, 5 U/ $\mu$ L) was added to the solution and incubated at 37°C for 2-3 hours. Ligated product (DNA-RNA hybrid) was resolved and purified by denaturing PAGE.

### Selection Step

The DNA-RNA hybrid (250 pmol in the first round and 10-30 pmol in further rounds) was incubated with 10 $\times$  selection buffer (1  $\mu$ L, 500 mM Tris-HCl, 1.5 M NaCl), pH = 7.5) in a total volume of 9.5  $\mu$ L. To initiate the reaction, MgCl<sub>2</sub> (0.5  $\mu$ L, 100 mM) with a final concentration of 5 mM was added and reaction mixture was incubated at 37°C for 16 hours. The active fraction of DNA enzymes was separated by denaturing PAGE and the areas corresponding to cleaved products (determined by comparison to size marker) were cut and extracted. Extracted products were ethanol precipitated and subjected to PCR amplification.

### PCR amplification of active DNA library fraction

The active fraction of the DNA library recovered in the selection step was amplified through two subsequent asymmetrical PCRs. For the first PCR, the extracted product from previous step was used as template. Template (dissolved in 30  $\mu$ L ultra pure water), forward primer (D2, 200 pmol), reverse primer (D3, 50 pmol), dNTP mixture (0.63  $\mu$ L, 20 mM), 10 $\times$  DreamTaq buffer (5  $\mu$ L) and DreamTaq DNA polymerase (0.25  $\mu$ L, 5 U/ $\mu$ L) were mixed and volume was adjusted to 50  $\mu$ L with water. The reaction mixture was subjected to PCR reaction with the following conditions: [95°C for 4 minutes, 10 $\times$  (95°C for 30 sec, 60°C for 30 sec, 72°C for 1 min) and 72°C for 5 minutes]. PCR-I product was stored at -20°C as backup sample (in case to repeat the selection round). For the second PCR, an aliquot (2  $\mu$ L) from PCR-I was used as template and mixed with fluorescently labeled forward primer (D2-flu, 200 pmol), reverse primer (D3, 50 pmol), dNTPs mixture (0.63  $\mu$ L, 20 mM), 10 $\times$  Dream Taq buffer (5  $\mu$ L) and Dream Taq DNA polymerase (0.5  $\mu$ L, 5 U/ $\mu$ L) and water to a final volume of 50  $\mu$ L. PCR conditions were: [95°C for 4 minutes, 30 $\times$  (95°C for 30 sec, 60°C for 30 sec, 72°C for 1 min) and 72°C for 5 minutes]. The PCR product was resolved on denaturing PAGE and the fluorescently labeled shorter strand was isolated. The purified PCR product then ligated to the RNA substrate to initiate the next round of selection.

## SUPPORTING INFORMATION

**5. Deep sequencing analysis of enriched selection libraries**

A schematic summary of sample preparation and sample nomenclature is shown in Figure S2a. In total, five Illumina libraries were prepared. The enriched DNA library from round 15 (AB\_R15) was subjected to NGS and named ab1. It was also used for additional 16<sup>th</sup> round (AB\_R16) with unmodified RNA (active: ab2, inactive: ab3), and with modified RNA (active: ab4, inactive: ab5). The isolated active and inactive fractions were amplified in a 2-step PCR protocol, in which Illumina adaptors and index sequences were added (Figure S2b). 1<sup>st</sup> PCR: forward primer (D6, 30 pmol), reverse primer (D7, 30 pmol), dNTPs mixture (0.63  $\mu$ L, 20 mM), 10 $\times$  DreamTaq buffer (5  $\mu$ L) and DreamTaq DNA polymerase (0.25  $\mu$ L, 5 U/ $\mu$ L) were mixed and volume was adjusted to 50  $\mu$ L with water. PCR conditions were: [95°C for 4 minutes, 25 $\times$  (95°C for 30 sec, 60°C for 30 sec, 72°C for 1 min) and 72°C for 5 minutes]. 2<sup>nd</sup> PCR was done with primers having index sequences. For each sample there was a unique index sequence in the reverse primer (D9-D13). An aliquot (2  $\mu$ L) from 1<sup>st</sup> PCR was used as template and mixed with forward primer\_D8 (100pmol), reverse primers\_D9-D13 (100 pmol), dNTPs mixture (0.63  $\mu$ L, 20 mM), 10 $\times$  Dream Taq buffer (5  $\mu$ L), DreamTaq DNA polymerase (0.25  $\mu$ L, 5 U/ $\mu$ L) and water to a final volume of 200  $\mu$ L. PCR conditions were: [95°C for 4 minutes, 30 $\times$  (95°C for 30 sec, 60°C for 30 sec, 72°C for 1 min) and 72°C for 5 minutes]. The PCR products were purified on a 2% agarose gel and submitted to the Core Unit Systems Medicine (University of Würzburg) for amplicon sequencing. After quality control on a Bioanalyzer, the libraries were pooled, and sequenced as a fraction of a NextSeq-500 HighOutput 75nt single end run. After trimming and demultiplexing, the fastq and fastqc files were obtained from the Core unit and further processed. The raw fastq files were deduplicated of PCR duplicates with PRINSEQ<sup>[5]</sup> (prinseq-lite.pl -fastq INPUT\_FILE -out\_format 3 -derep 1 -out\_good OUTPUT\_FILE). Afterwards, the reads were trimmed of UMIs, and constant regions and filtered to the length of 18–21 nt with cutadapt<sup>[6]</sup> (cutadapt -g "CGACTAGTTACGGAAG;e=0.2" -a "CTTCATTGAGTTGGCC;e=0.3" -m 18 -M 21 --overlap 10 --times 2 -o OUTPUT\_FILE INPUT\_FILE). The processed reads were further analyzed using FASTAptamer<sup>[7]</sup> and custom R scripts. Multiple sequence alignment was carried out with msa<sup>[8]</sup> and sequence logos were generated using ggseqlogo.<sup>[9]</sup>

**6. Single turnover kinetics characterization of deoxyribozymes**

In a typical experiment for determining the trans-activity of individual deoxyribozymes, the synthetic deoxyribozyme (100 pmol) was mixed with 3' fluorescently labeled RNA substrate (10 pmol) in a final volume of 8.5  $\mu$ L. Mixture was heated to 95°C for 4 minutes followed by cooling at 25°C for 10 minutes. To initiate the reaction, 10 $\times$  kinetic assay buffer (1  $\mu$ L, 500 mM Tris-HCl, 1.5 M NaCl), pH = 7.5 and MgCl<sub>2</sub> (0.5  $\mu$ L, 400 mM) were added and reaction mixture was incubated at 37°C. Aliquots (1  $\mu$ L) were taken at different time points (0, 10, 30, 60, 120, 180, and 360 min, sometimes 22h), quenched with loading buffer and analyzed by denaturing PAGE. The gels were imaged on a Chemidoc device and the cleavage yield was determined from band intensities quantified by ImageLab software. Values of  $k_{\text{obs}}$  (observed cleavage rate) and  $Y_{\text{max}}$  (maximum yield) were obtained by fitting cleavage yield *versus* time (min) with first order kinetics equation;  $Y = Y_{\text{max}} * (1 - e^{-k_{\text{obs}} * t})$ . Three independent replicates were performed for each experiment.



## SUPPORTING INFORMATION

## 7. Supporting Tables

Table S1. Sequences and ESI-MS of RNA oligonucleotides

| No  | Description                                              | 5'-Sequence-3'                                             | mol.wt.<br>calc. amu | mol.wt.<br>found m/z |
|-----|----------------------------------------------------------|------------------------------------------------------------|----------------------|----------------------|
| R1  | Unmodified RNA                                           | AUAGACUGAAUGAAGGACUUCGUAACU                                | 8966.24              | 8966.31              |
| R1a | Unmod. with 3'-C <sub>6</sub> -NH <sub>2</sub>           | AUAGACUGAAUGAAGGACUUCGUAACU-NH <sub>2</sub>                | 9145.31              | 9145.49              |
| R2  | i <sup>6</sup> A RNA                                     | AUAGACUGAAUGAAGGi <sup>6</sup> ACUUCGUAACU                 | 9034.30              | 9034.35              |
| R2a | i <sup>6</sup> A with 3'-C <sub>6</sub> -NH <sub>2</sub> | AUAGACUGAAUGAAGGi <sup>6</sup> ACUUCGUAACU-NH <sub>2</sub> | 9213.37              | 9213.48              |
| R3  | m <sup>6</sup> A RNA                                     | AUAGACUGAAUGAAGGm <sup>6</sup> ACUUCGUAACU                 | 8980.34              | 8980.45              |
| R3a | m <sup>6</sup> A with 3'-C <sub>6</sub> -NH <sub>2</sub> | AUAGACUGAAUGAAGGm <sup>6</sup> ACUUCGUAACU-NH <sub>2</sub> | 9159.41              | 9159.33              |

Table S2. Sequences of DNA oligonucleotides

| No                 | Description                              | 5'-Sequence-3'                                               |
|--------------------|------------------------------------------|--------------------------------------------------------------|
| D1                 | Selection pool                           | GTGACGCGACTAGTTACGGGAAGN <sub>20</sub> CTTCATTCAGTTGGCGCCTCC |
| D2                 | Selection forward primer                 | Hexynyl-GTGACGCGACTAGTTAC                                    |
| D3                 | Selection reverse primer (tailed)        | (CAA) <sub>4</sub> E <sub>3</sub> GGAGGCGCCAACCTGAATGAA      |
| D4                 | Splint for selection pool (round 1)      | TTCATTCAGTCTATGGAGGCGCCAACCTG                                |
| D5                 | Splint for other selection rounds        | TTCATTCAGTCTATGGAGGCGCCAACCTG                                |
| D6                 | 1 <sup>st</sup> _PCR_forward_NGS_UMI     | TCGTCGGCAGCGTCAGATGTGTATAAGAGACAGNNNNNNNNCGACTAGTTACGGGAAG   |
| D7                 | 1 <sup>st</sup> _PCR_reverse_NGS         | GTCTCGTGGGCTCGGAGATGTGTATAAGAGACAGGCCAACTGAATGAAG            |
| D8                 | 2 <sup>nd</sup> _PCR_forward_NGS_i5_S502 | AATGATACGGCGACCACCGAGATCTACACCTCTCTATTCGTCGGCAGCGTC          |
| D9                 | 2 <sup>nd</sup> _PCR_reverse_NGS_i7_N706 | CAAGCAGAAGACGGCATAACGAGATCATGCTTAGTCTCGTGGGCTCGG             |
| D10                | 2 <sup>nd</sup> _PCR_reverse_NGS_i7_N707 | CAAGCAGAAGACGGCATAACGAGATGTAGAGAGGTCTCGTGGGCTCGG             |
| D11                | 2 <sup>nd</sup> _PCR_reverse_NGS_i7_N710 | CAAGCAGAAGACGGCATAACGAGATCAGCCTCGGTCTCGTGGGCTCGG             |
| D12                | 2 <sup>nd</sup> _PCR_reverse_NGS_i7_N711 | CAAGCAGAAGACGGCATAACGAGATTCCTCTTGTCTCGTGGGCTCGG              |
| D13                | 2 <sup>nd</sup> _PCR_reverse_NGS_i7_N712 | CAAGCAGAAGACGGCATAACGAGATTCCTCTACGTCTCGTGGGCTCGG             |
| <b>DNA enzymes</b> |                                          |                                                              |
| D14                | AA07                                     | TAGTTACGGAAGGGGTTCGGTGGAGCGGCGGATTTCATTCAGT                  |
| D15                | AA14                                     | TAGTTACGGAAGTGGTCTCGCGGTTCCTGGTTATTCATTCAGT                  |
| D16                | AA17                                     | TAGTTACGGAAGCCTGCAAGGAGGTTTACCGGGTTCATTCAGT                  |
| D17                | AB08                                     | TAGTTACGGAAGGGGAAGCCAGTGGTACGTTCTTCATTCAGT                   |
| D18                | AB08_A4G                                 | TAGTTACGGAAGGGGGAGCCAGTGGTACGTTCTTCATTCAGT                   |
| D19                | AB08_A4C                                 | TAGTTACGGAAGGGGGCAGCCAGTGGTACGTTCTTCATTCAGT                  |
| D20                | AB08_A4T                                 | TAGTTACGGAAGGGGGTAGCCAGTGGTACGTTCTTCATTCAGT                  |
| D21                | AB08_ΔA4                                 | TAGTTACGGAAGGGGG_AGCCAGTGGTACGTTCTTCATTCAGT                  |
| D22                | AB08_T19A                                | TAGTTACGGAAGGGGAAGCCAGTGGTACGTACTTCATTCAGT                   |
| D23                | AB08_T19C                                | TAGTTACGGAAGGGGAAGCCAGTGGTACGTCCTTCATTCAGT                   |
| D24                | AB08_T19G                                | TAGTTACGGAAGGGGAAGCCAGTGGTACGTCCTTCATTCAGT                   |
| D25                | AB08* (AB08_□T14,T19G)                   | TAGTTACGGAAGGGGAAGCCAGTGGTACGTT_ACGTCTTCATTCAGT              |
| D26                | AB08_restored binding arm                | TAGTTACGGAAGGGGAAGCCAGTGGTACGTTCTTCATTCAGT                   |
| D27                | AC17                                     | TAGTTACGGAAGGGGTCTCCAGCCGGACGTTATTCATTCAGT                   |
| D28                | AC17_ΔA20                                | TAGTTACGGAAGGGGTCTCCAGCCGGACGTT_TTCATTCAGT                   |
| D29                | AC17_ΔT19                                | TAGTTACGGAAGGGGTCTCCAGCCGGACGTT_ATTCATTCAGT                  |
| D30                | AC17_A20C                                | TAGTTACGGAAGGGGTCTCCAGCCGGACGTTCTTCATTCAGT                   |
| D31                | AC17_A20G                                | TAGTTACGGAAGGGGTCTCCAGCCGGACGTTCTTCATTCAGT                   |
| D32                | AC17_C12T (VMC10)                        | TAGTTACGGAAGGGGTCTCCAGCTGGACGTTATTCATTCAGT                   |

## SUPPORTING INFORMATION

**Table S3. Summary of NGS analysis data**

| library                    | ab1             | ab4                                        | ab5                                            | sum I<br>(ab1+4+5) | ab2                         | ab3                             | sum II<br>(ab2+3) |
|----------------------------|-----------------|--------------------------------------------|------------------------------------------------|--------------------|-----------------------------|---------------------------------|-------------------|
| Round selection            | 15<br>reference | 16<br>positive                             | 16<br>positive                                 |                    | 16<br>negative              | 16<br>negative                  |                   |
| RNA activity               | -<br>reference  | i <sup>6</sup> A (R2)<br>cleaved<br>active | i <sup>6</sup> A (R2)<br>uncleaved<br>inactive |                    | A (R1)<br>cleaved<br>active | A (R1)<br>uncleaved<br>inactive |                   |
| total reads (deduplicated) | 750.106         | 345.138                                    | 252.618                                        | 1.347.862          | 773.935                     | 616.504                         | 1.390.439         |
| unique sequences           | 115.993         | 16.248                                     | 43.496                                         | 175.737            | 62.876                      | 104.136                         | 167.012           |
| seqs (> 50 reads)          | 796             | 340                                        | 275                                            | 1411               | 909                         | 663                             | 1572              |
| AB08 (-d4 -f50)            |                 |                                            |                                                |                    |                             |                                 |                   |
| cluster size               | 73              | 54                                         | 27                                             | 154                | 48                          | 60                              | 108               |
| reads                      | 47.794          | 37.702                                     | 11.663                                         | 97.159             | 21.968                      | 36.872                          | 58.840            |
| % of total                 | 6.4             | 10.9                                       | 4.6                                            | 21.9               | 2.8                         | 6.0                             | 8.8               |
| AC17                       |                 |                                            |                                                |                    |                             |                                 |                   |
| # variants                 | 538             | 125                                        | 225                                            | 888                | 1.177                       | 426                             | 1.603             |
| AC17_ΔA20                  |                 |                                            |                                                |                    |                             |                                 |                   |
| # variants                 | 1.277           | 420                                        | 524                                            | 2.221              | 2.172                       | 1.025                           | 3.197             |
| reads                      | 15.930          | 6.491                                      | 3.626                                          | 26.047             | 26.979                      | 10.047                          | 37.026            |
| % of total                 | 2.1             | 1.9                                        | 1.4                                            | 5.4                | 3.5                         | 1.6                             | 5.1               |

**Table S4. Catalytic activities of DNA enzymes reported in this study**

| DNA          | Unmodified RNA (R1) |                                                      |             | i <sup>6</sup> A-modified RNA (R2) |                                                      |             |
|--------------|---------------------|------------------------------------------------------|-------------|------------------------------------|------------------------------------------------------|-------------|
|              | site                | $k_{\text{obs}}$ [ $\cdot 10^{-2} \text{min}^{-1}$ ] | yield% @ 6h | site                               | $k_{\text{obs}}$ [ $\cdot 10^{-2} \text{min}^{-1}$ ] | yield% @ 6h |
| AA07         | G15                 | 0.11                                                 | 42          | -                                  | no cleavage                                          | -           |
| AA14         | G15                 | 0.66                                                 | 74          | -                                  | no cleavage                                          | -           |
| AA17         | G16                 | 0.65                                                 | 77          | -                                  | no cleavage                                          | -           |
| AB08         | -                   | no cleavage                                          | -           | G16                                | 0.86                                                 | 75          |
| AB08-A4G     | -                   | no cleavage                                          | -           | G16                                | 0.27                                                 | 65          |
| AB08-A4C     | -                   | no cleavage                                          | -           | G16                                | 0.64                                                 | 77          |
| AB08-A4T     | -                   | no cleavage                                          | -           | G16                                | 0.30                                                 | 67          |
| AB08-ΔA4     | -                   | no cleavage                                          | -           | -                                  | no cleavage                                          | -           |
| AB08-T19G    | -                   | no cleavage                                          | -           | G16                                | 0.28                                                 | 58          |
| AB08-T19A    | -                   | no cleavage                                          | -           | G16                                | 0.26                                                 | 54          |
| AB08-T19C    | -                   | no cleavage                                          | -           | -                                  | no cleavage                                          | -           |
| AB08*Δ14T19G | -                   | no cleavage                                          | -           | G16                                | 0.97                                                 | 75          |
| AC17         | G16                 | 1.8                                                  | 82          | G15                                | 0.16                                                 | 51          |
| AC17-ΔT19    | G16                 | 0.41                                                 | 60          | G15                                | 0.70                                                 | 73          |
| AC17-A20G    | G16                 | 1.1                                                  | 84          | G15                                | 0.12                                                 | 48          |
| AC17-A20C    | G16                 | 1.7                                                  | 87          | G15                                | 0.05                                                 | 18          |
| AC17-ΔA20    | G16                 | 0.04                                                 | 21          | G15                                | 1.3                                                  | 81          |
| AC17-C12T    | G16                 | 0.77                                                 | 81          | G15                                | 0.08                                                 | 25          |

## SUPPORTING INFORMATION

## 8. Supporting Figures

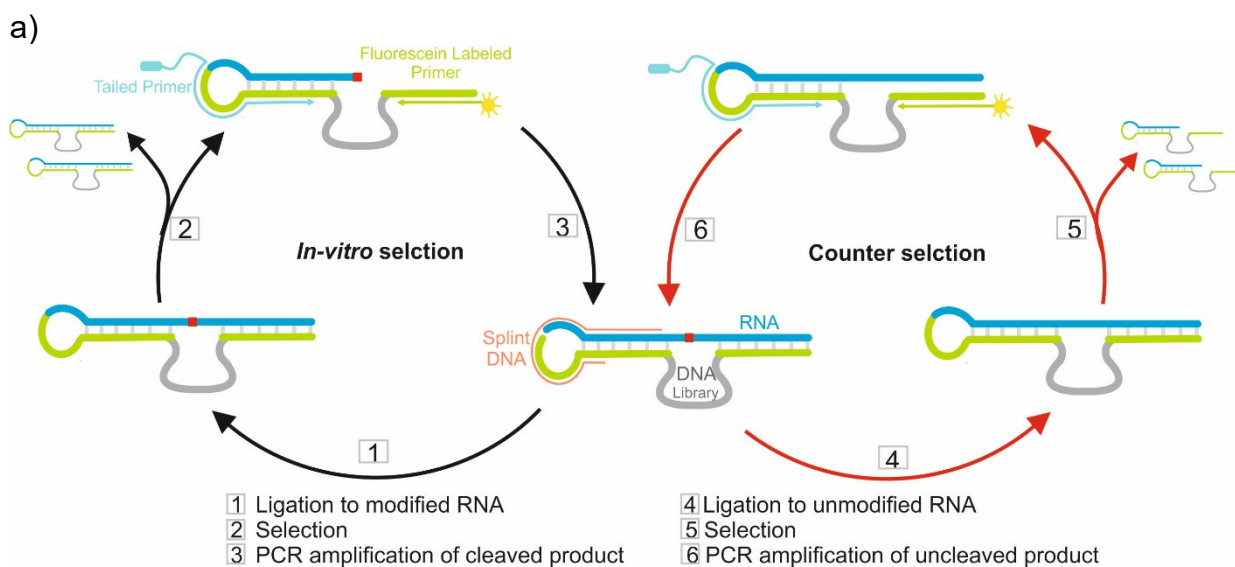

b)

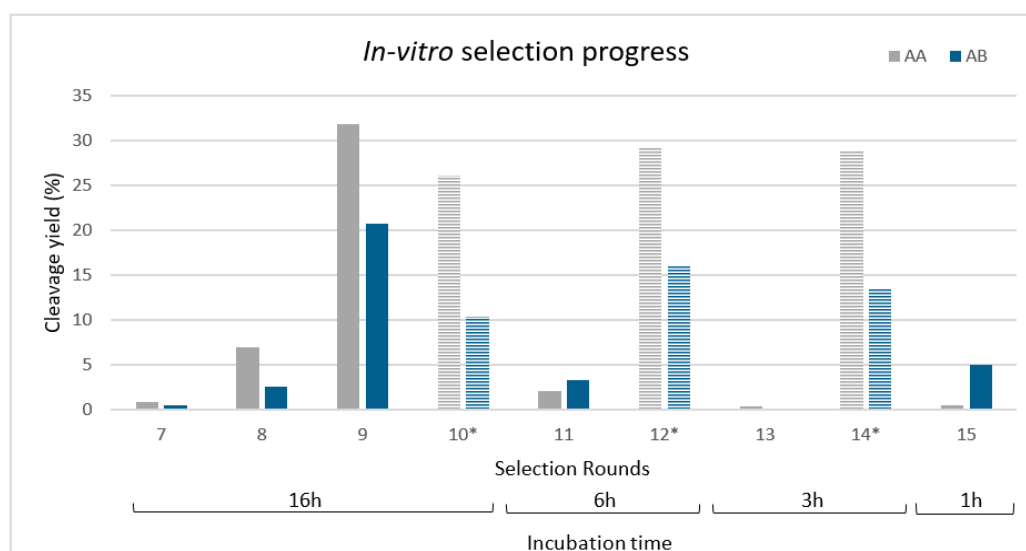

**Figure S1.** a) Schematic presentation of in vitro selection experiment to evolve  $i^6$ A-sensitive RNA cleaving deoxyribozymes (AB selection). In-Vitro selection: 1. Ligation of DNA library with modified RNA (R2). 2. Selection step in presence of  $MgCl_2$  (5 mM, pH 7.5, 37°C). Cleaved fraction is isolated by PAGE. 3. PCR amplification of active fraction. Counter selection to enhance selectivity of the DNA enzymes: 4. Ligation of DNA library to unmodified RNA (R1). 5. Selection in presence of  $MgCl_2$  (5 mM, pH 7.5, 37°C). The uncleaved fraction is isolated from PAGE. 6. PCR amplification of uncleaved fraction. For the AA selection, the procedure started with ligation of unmodified RNA, and the counter selection rounds were performed with  $i^6$ A-RNA. b) Progress of in-vitro selection plotted as % cleaved in each selection round. From round 1-6 fluorescence was below the detection limit. From round 7, the DNA pool was enriched enough to determine cleavage yield by measuring fluorescent band intensity during selection step by imaging the gel on a ChemiDoc imager. In round 11, the incubation time for selection was decreased to 6 h, and then further to 3 h in round 13 and finally to 1 h in round 15. The counter selection rounds are marked with asterisks and incubation time was 16 hour for each counter selection step.

## SUPPORTING INFORMATION

a)

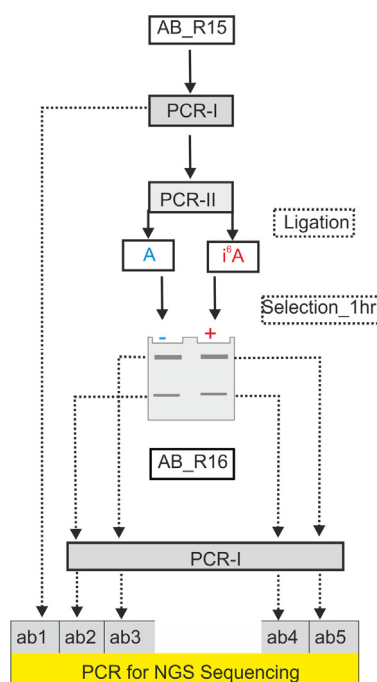

b)

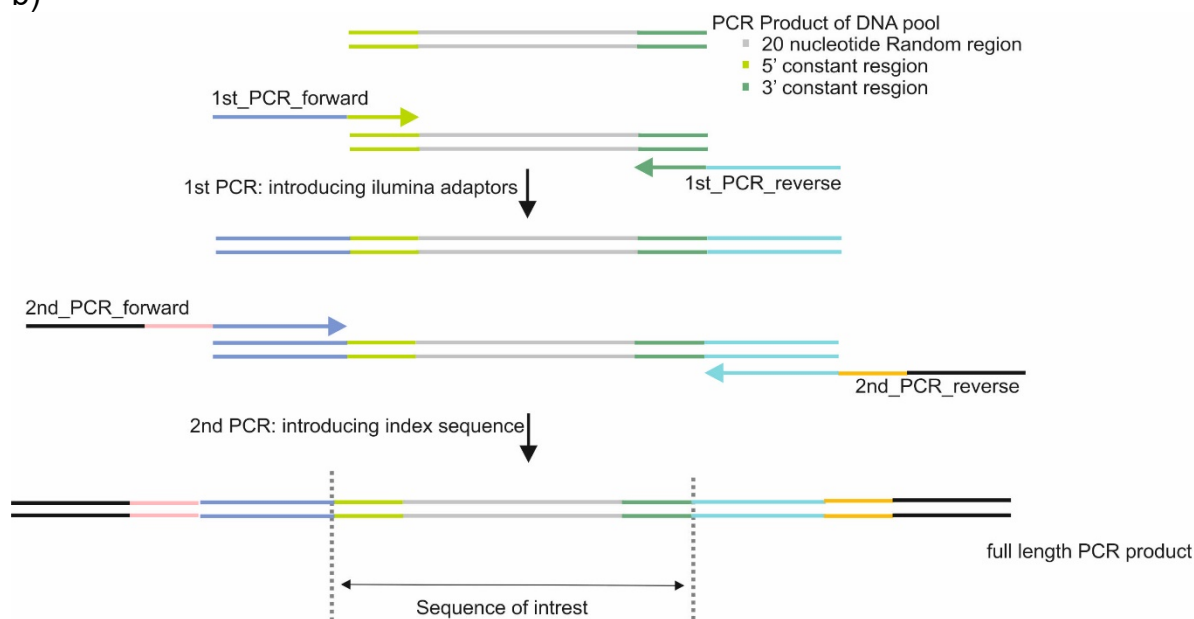

**Figure S2.** a) Schematic presentation of NGS libraries from round 15 and round 16. b) Schematic presentation of two-step-PCR for NGS library preparation to include Illumina adaptors and barcodes. The catalytic core (from 20 nt random region) is shown in grey, the 5' primer binding site in light green and 3' primer binding site in dark green. The 1<sup>st</sup> PCR introduces adaptor sequences (presented in blue and cyan, with primers D6 and D7 in Table S1), and the 2<sup>nd</sup> PCR introduces index sequences (pink and orange) from primers D8-D13. A unique index primer (2<sup>nd</sup>\_PCR\_reverse i7\_primer, D9-D13) is used for each sample ab1-ab5.

## SUPPORTING INFORMATION

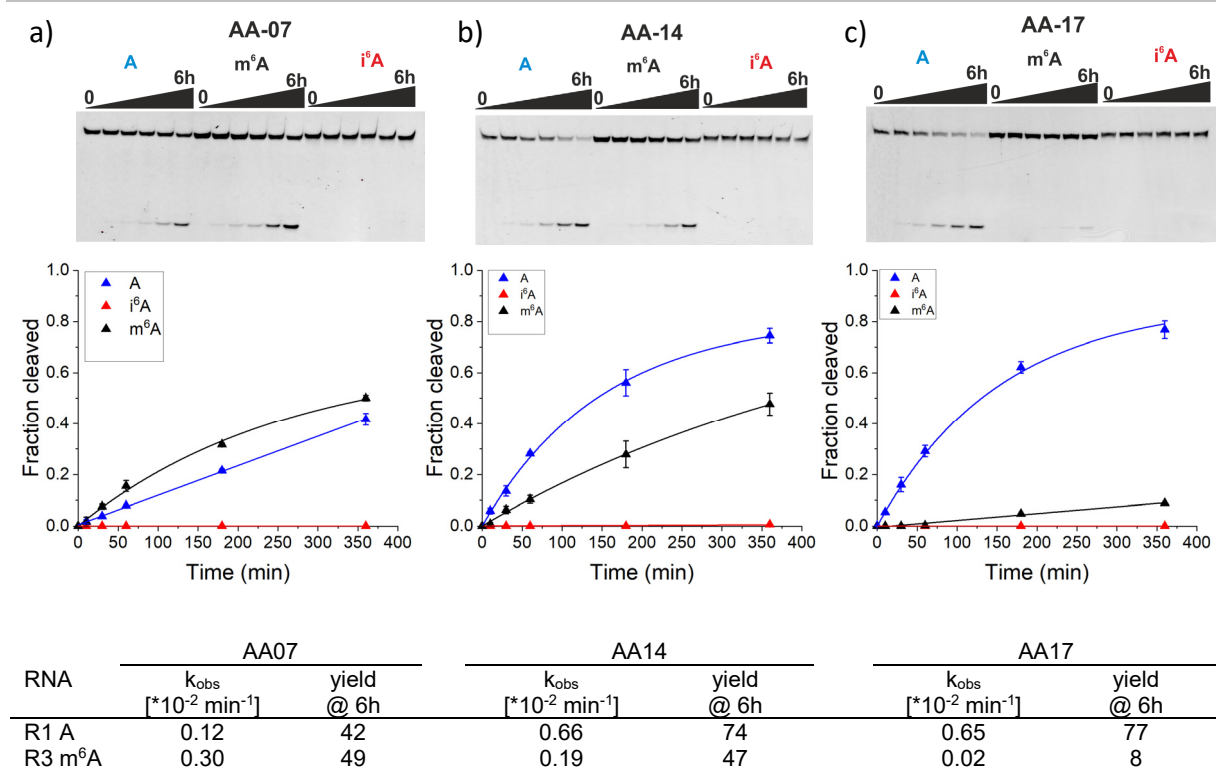

**Figure S3.** Gel images, kinetic plots, rates and yields for AA DNA enzymes tested with unmodified RNA (R1), i<sup>6</sup>A-RNA (R2) and m<sup>6</sup>A-RNA (R3). Conditions: 1  $\mu\text{M}$  RNA incubated with 10  $\mu\text{M}$  DNA enzyme, 50 mM Tris-HCl, pH 7.5, 150 mM NaCl, 20 mM MgCl<sub>2</sub>, 37°C. time points: 0, 10, 30, 60, 180, 360 min.

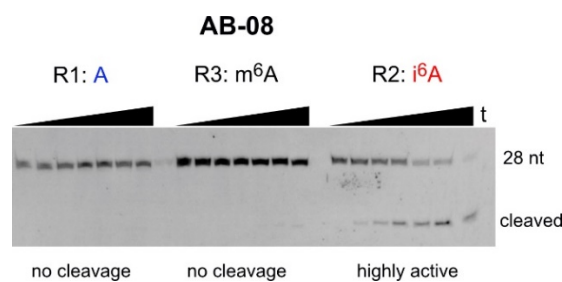

**Figure S4.** Gel image of AB08 tested on m<sup>6</sup>A-RNA (R3), in comparison to R1 and R2. No cleavage was observed for m<sup>6</sup>A-modified RNA, indicating that AB08 is specific for i<sup>6</sup>A RNA. Conditions: 1  $\mu\text{M}$  RNA incubated with 10  $\mu\text{M}$  DNA enzyme in 50 mM Tris-HCl, pH 7.5, 150 mM NaCl, 20 mM MgCl<sub>2</sub>, 37°C. Time points: 0, 10, 30, 60, 120, 180, 360 min.

## SUPPORTING INFORMATION

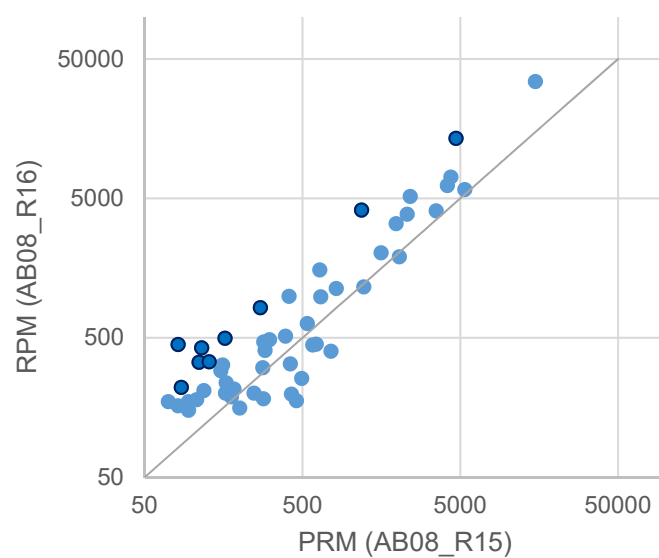

|          | Sequence                                      | RPM (x)<br>R15(ab1) | RPM (y)<br>R16(ab4) | enrichment<br>(y/x) |
|----------|-----------------------------------------------|---------------------|---------------------|---------------------|
| AB08     | GGGAAGCCAGTGGTACGTT                           | 14981.9             | 34351.5             | 2.29                |
|          | GGG <b>T</b> AGCCAGTGG_A <b>C</b> GT <b>G</b> | 81.3                | 446.2               | 5.49                |
|          | GGG <b>T</b> AGCCAGTGG_A <b>C</b> GT <b>T</b> | 114.7               | 423.0               | 3.69                |
| AB08*    | GGGAAGCCAGTGG_A <b>C</b> GT <b>G</b>          | 1185.2              | 4111.4              | 3.47                |
|          | GGGAAGCCAGTGG_A <b>C</b> GT <b>T</b>          | 161.3               | 495.5               | 3.07                |
|          | GGG <b>T</b> AGCCAGTGG_A <b>C</b> GT <b>A</b> | 270.6               | 820.0               | 3.03                |
|          | GGG <b>C</b> AGCCAGTGG_A <b>C</b> GT <b>T</b> | 110.7               | 333.2               | 3.01                |
| AB08_A4C | GGG <b>C</b> AGCCAGTGGTACGTT                  | 4695.3              | 13461.3             | 2.87                |
|          | GG <b>A</b> AAGCCAGTGGTACGTT                  | 128.0               | 336.1               | 2.63                |
|          | GGGAAGCC <b>G</b> GTGGTACGTT                  | 85.3                | 220.2               | 2.58                |

**Figure S5.** Abundance of AB08 variants in NGS data from round 15 and round 16. Only Sequences with >50 RPM in round 16 are plotted. The most enriched variants are highlighted in dark blue, their sequences, RPM and enrichment factors are given, and mutations in comparison to AB08 are highlighted in red.

## SUPPORTING INFORMATION

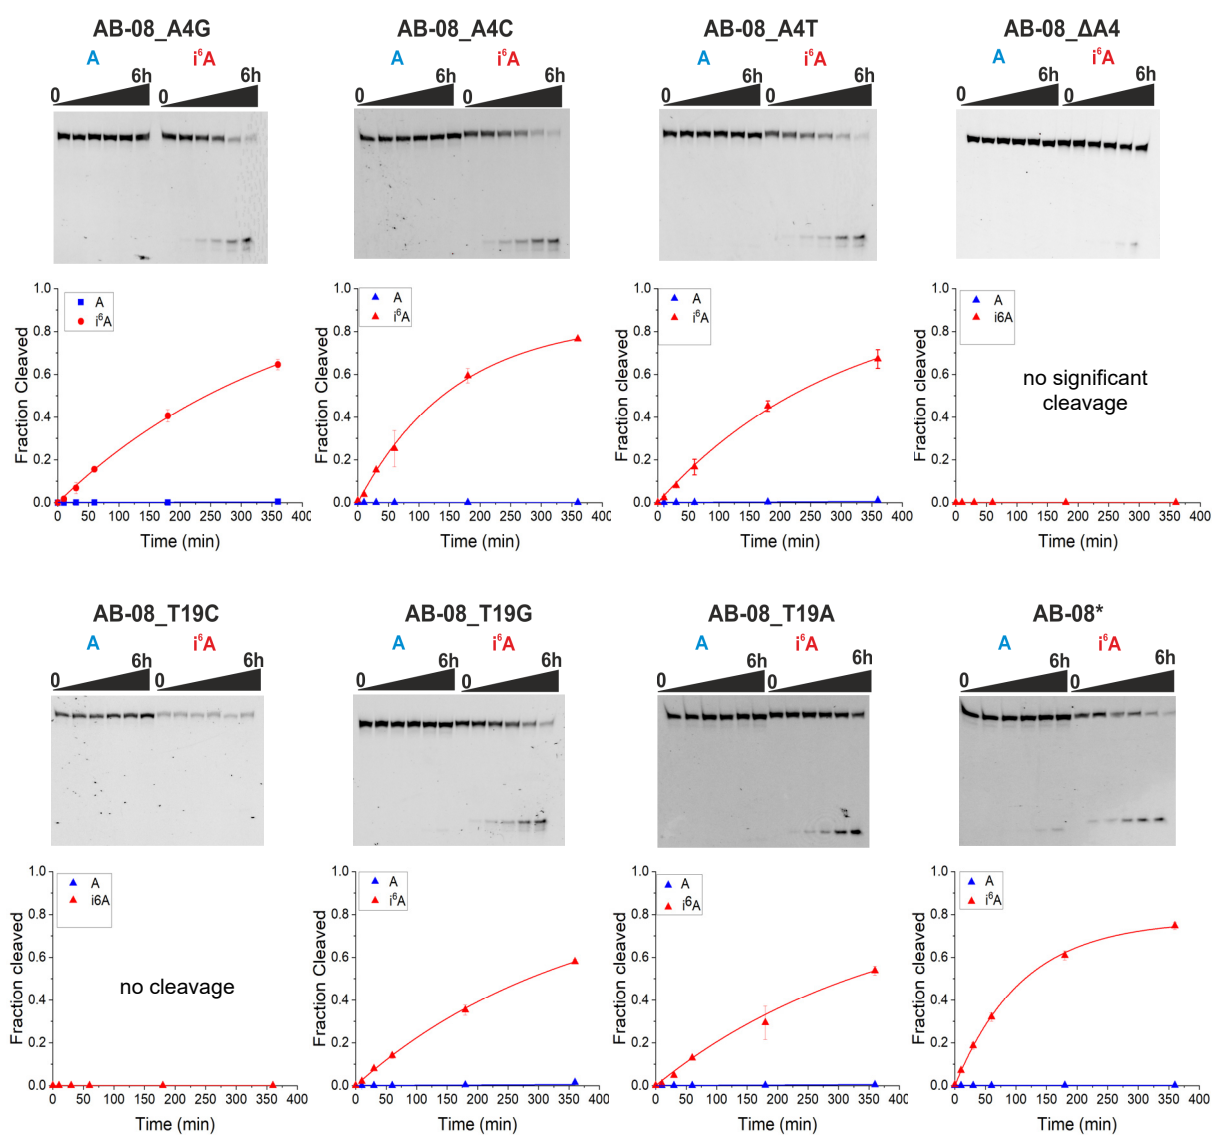

**Figure S6.** Gel images and kinetic plots for AB08 variants given in Table 2 in the manuscript. Conditions: 1  $\mu\text{M}$  RNA incubated with 10  $\mu\text{M}$  DNA enzyme in 50 mM Tris-HCl, pH 7.5, 150 mM NaCl, 20 mM MgCl<sub>2</sub>, 37°C. Time points: 0, 10, 30, 60, 180, 360 min.

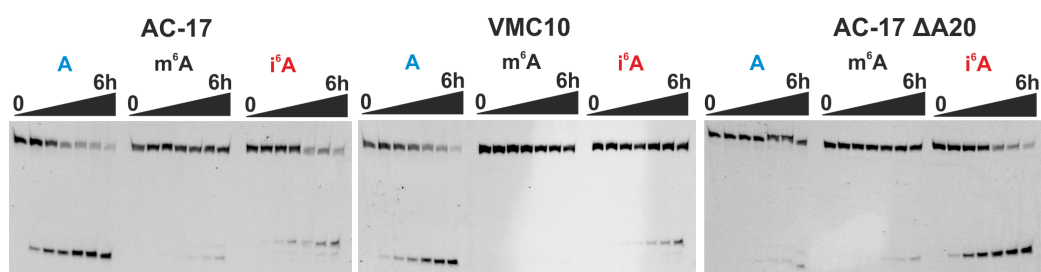

**Figure S7.** Gel images for plots in Figure 4. Conditions: 1  $\mu\text{M}$  RNA incubated with 10  $\mu\text{M}$  DNA enzyme in 50 mM Tris-HCl, pH 7.5, 150 mm NaCl, 20 mM MgCl<sub>2</sub>, 37°C. Timepoints: 0, 10, 30, 60, 120, 180, 360 min.

## SUPPORTING INFORMATION

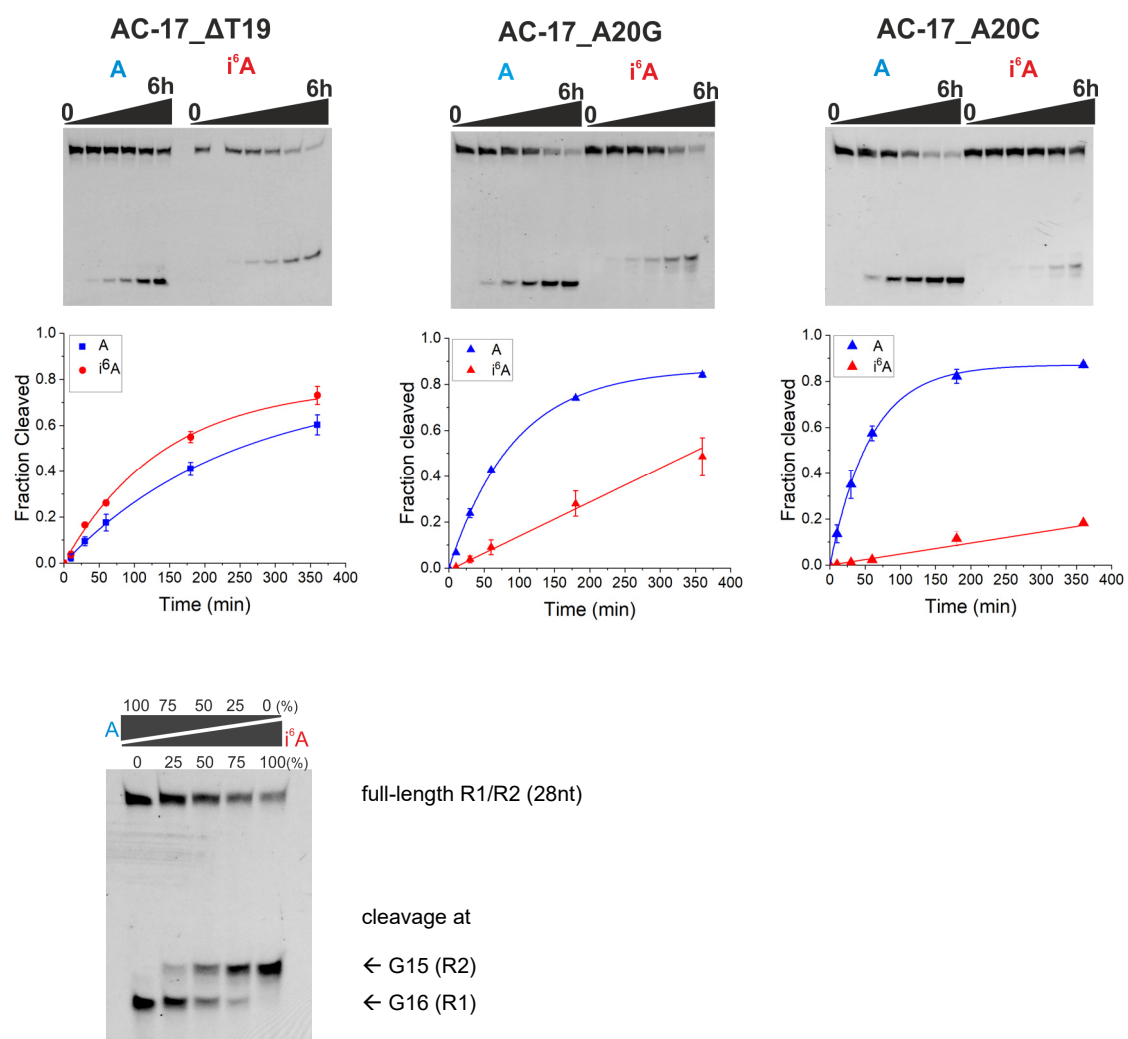

**Figure S8.** Top: Gel images and kinetic plots of AC17 variants given in Table 2 in the manuscript. Conditions: 1  $\mu$ M RNA incubated with 10  $\mu$ M DNA enzyme in 50 mM Tris-HCl, pH 7.5, 150 mM NaCl, 20 mM MgCl<sub>2</sub>, 37°C. Timepoints: 0, 10, 30, 60, 180, 360 min. Bottom: Samples containing both R1 and R2 - with increasing amount of i<sup>6</sup>A-RNA from left to right - were cleaved with AC17-ΔT19 for 6 h. The ratio of both cleavage products correlates to the i<sup>6</sup>A content.



## SUPPORTING INFORMATION

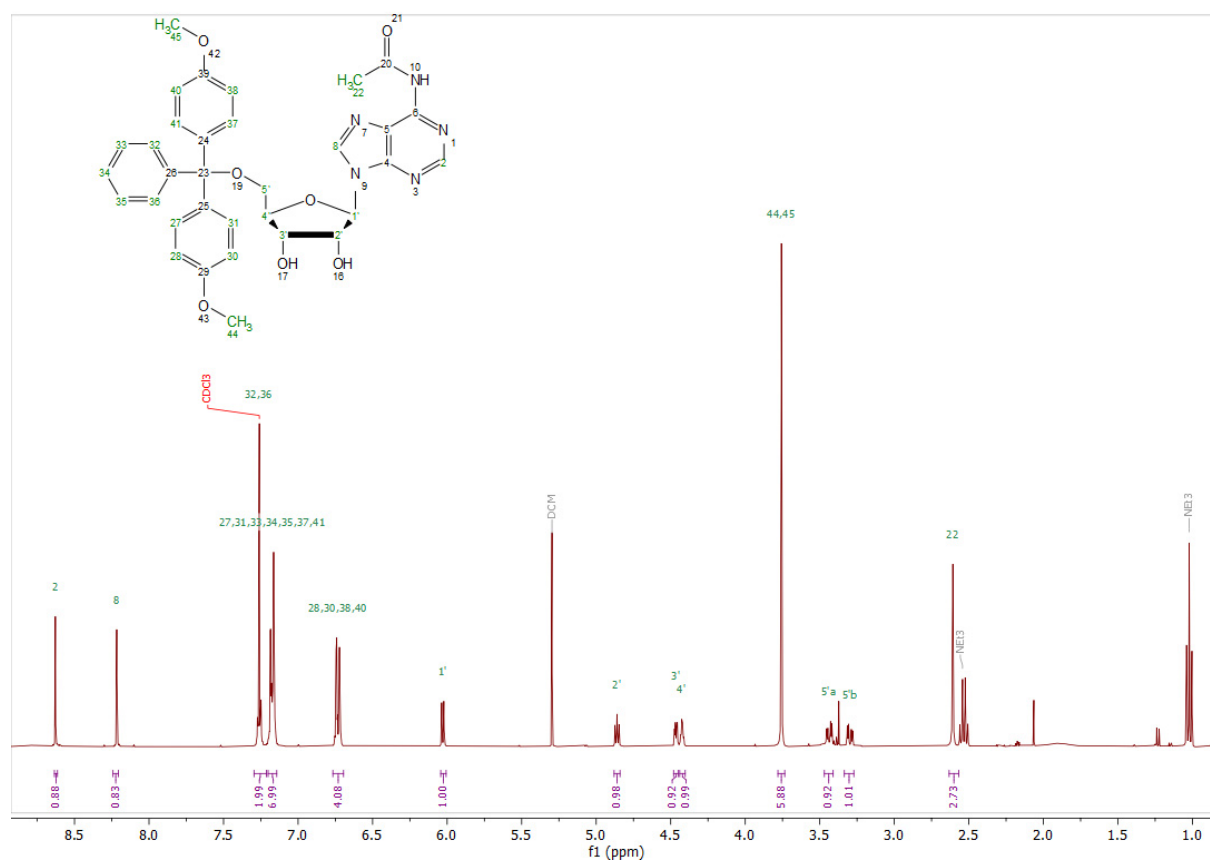

**Figure S9.**  $^1\text{H-NMR}$  spectrum for **2**.

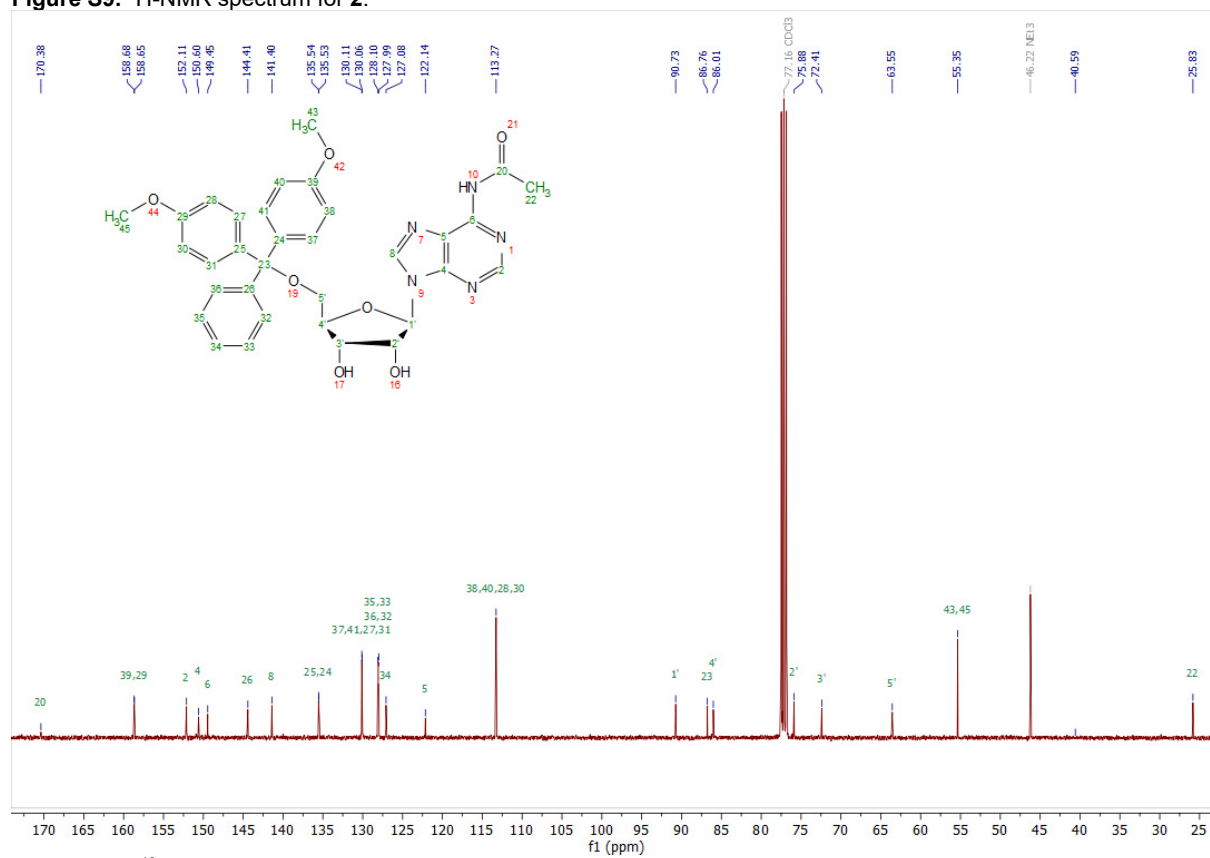

**Figure S10.**  $^{13}\text{C-NMR}$  spectrum for **2**.

## SUPPORTING INFORMATION

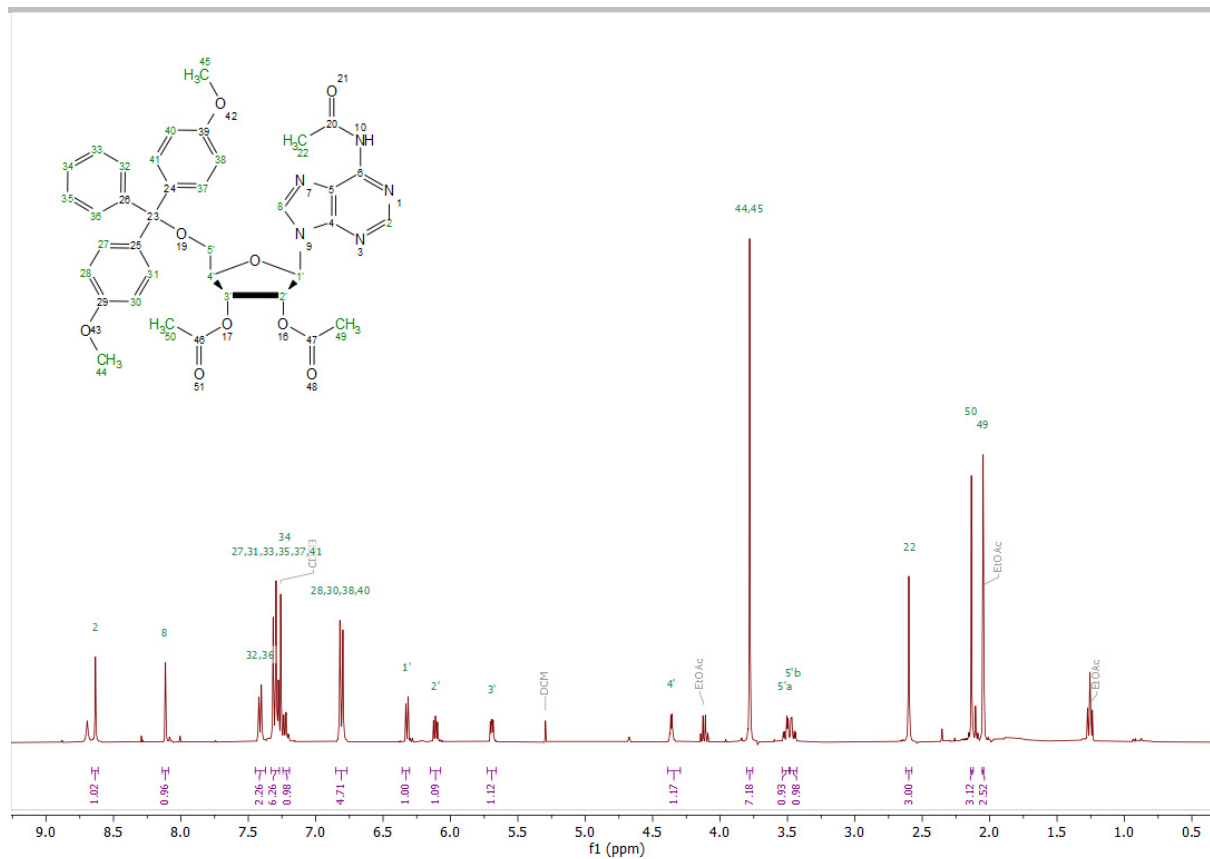Figure S11. <sup>1</sup>H-NMR spectrum for 3.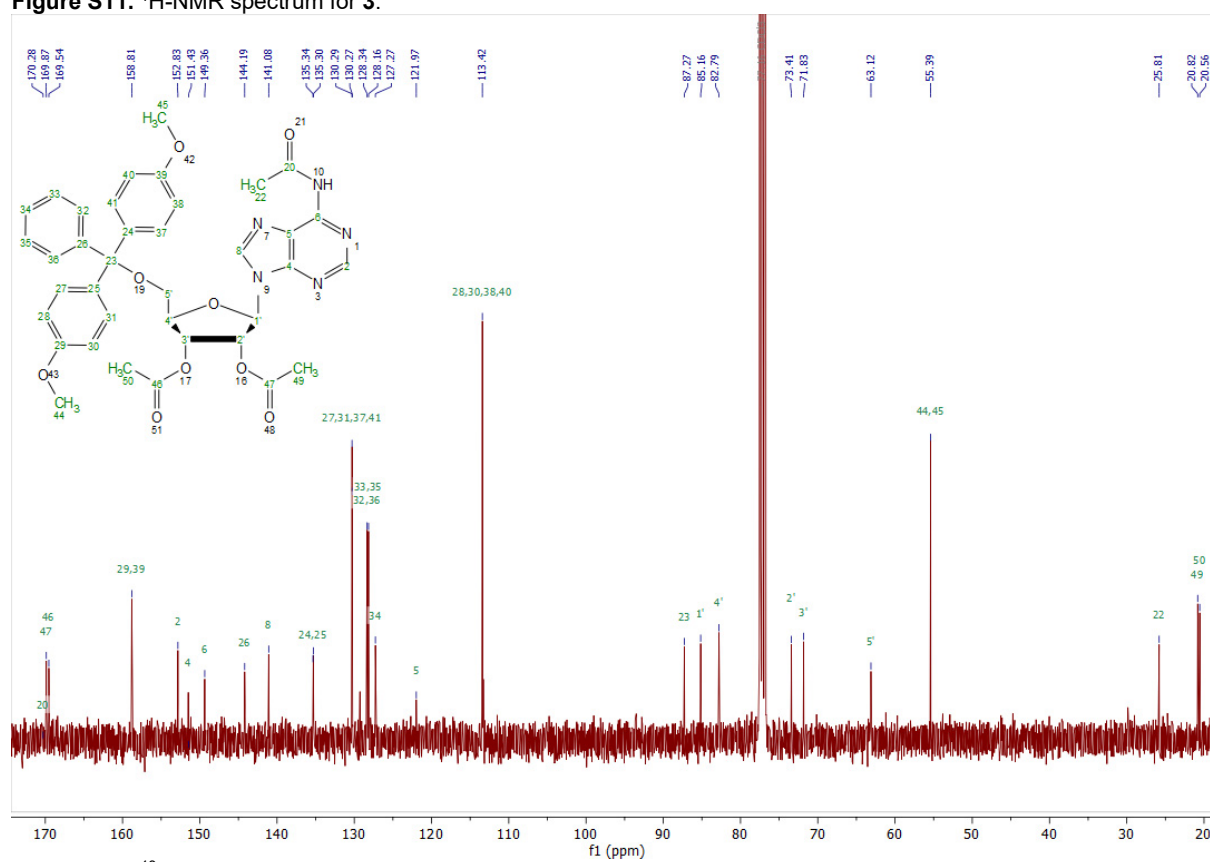Figure S12. <sup>13</sup>C-NMR spectrum for 3.

## SUPPORTING INFORMATION

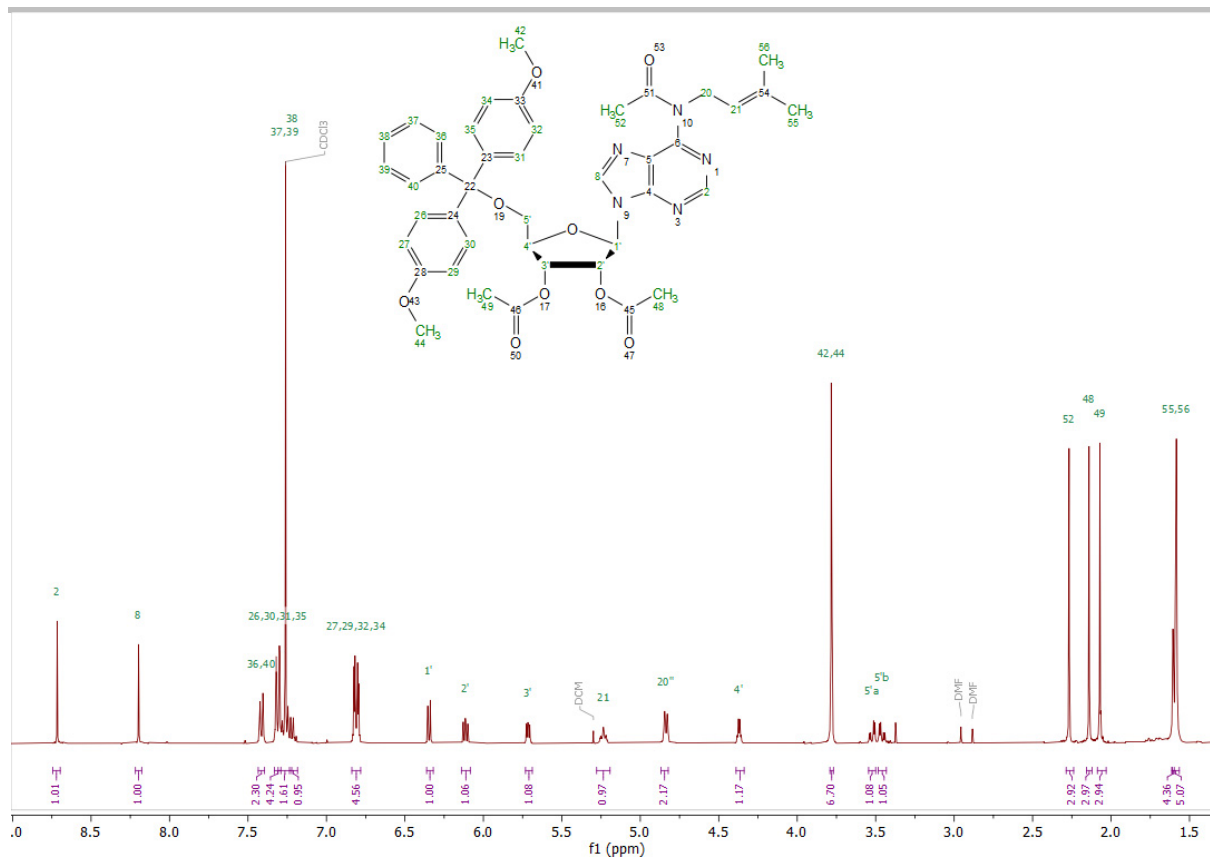

**Figure S13.**  $^1\text{H-NMR}$  spectrum for 4.

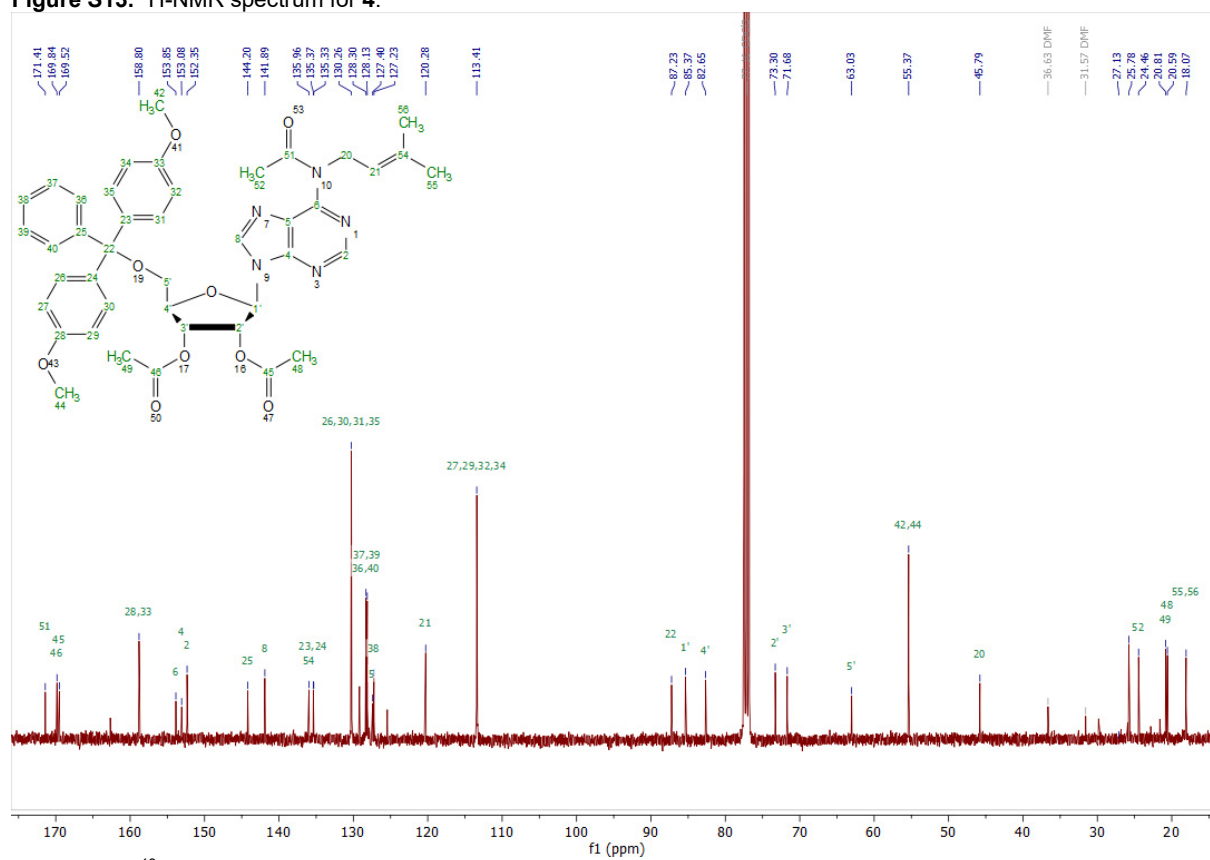

**Figure S14.**  $^{13}\text{C-NMR}$  spectrum for 4.

## SUPPORTING INFORMATION

HSQC

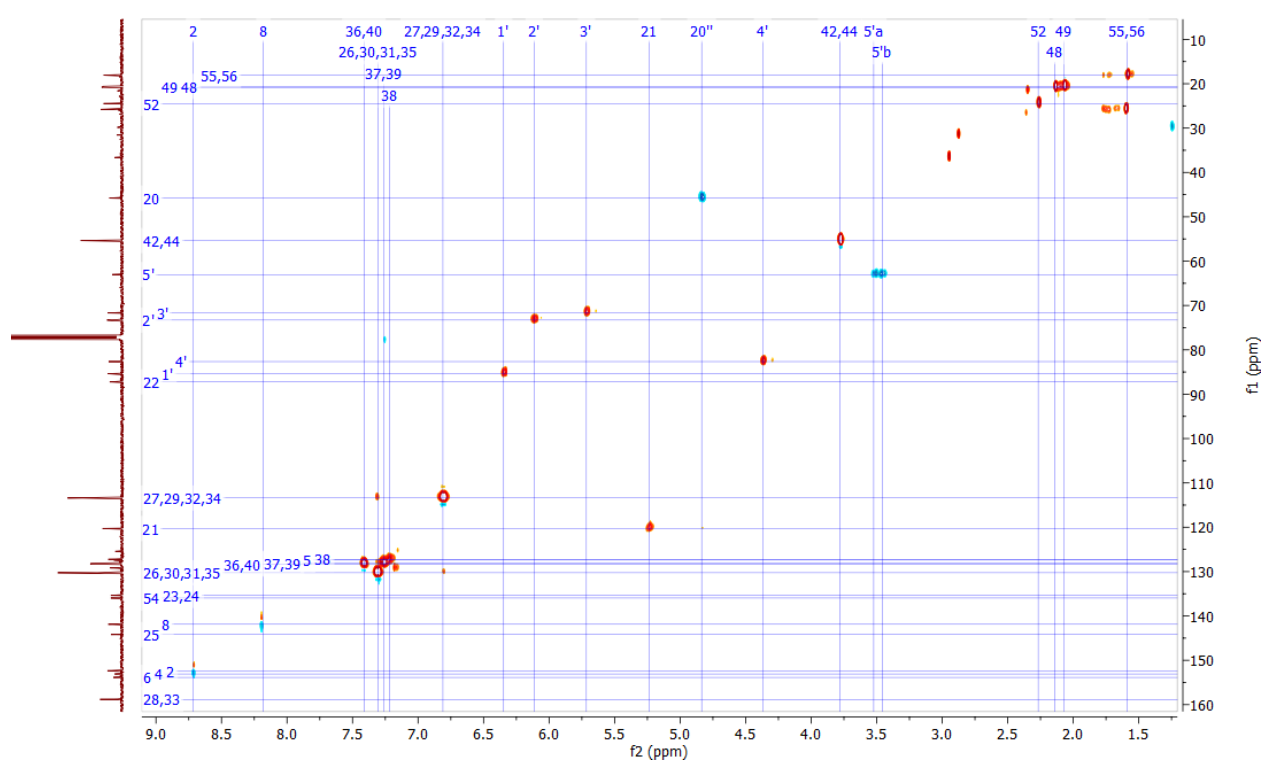

HMBC

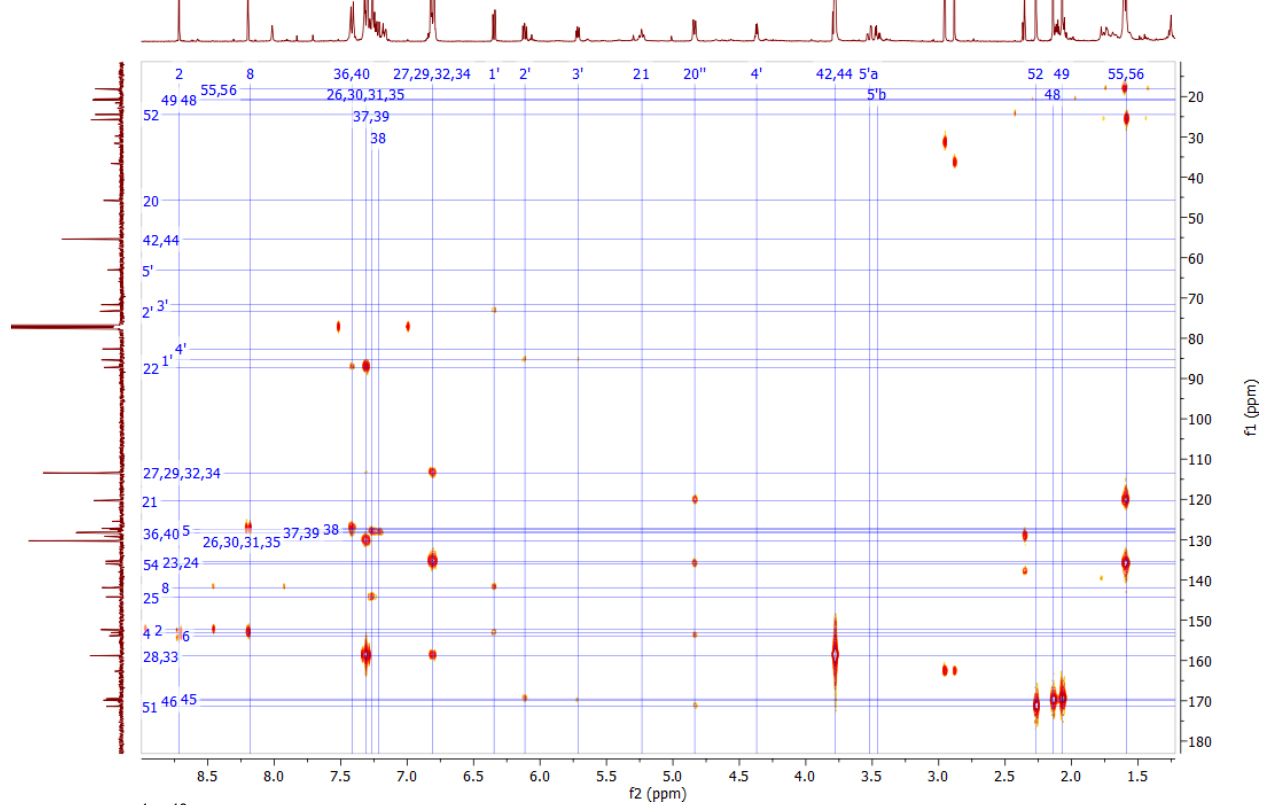Figure S15.  $^1\text{H}$ ,  $^{13}\text{C}$ -2D-NMR spectra for **4**.

## SUPPORTING INFORMATION

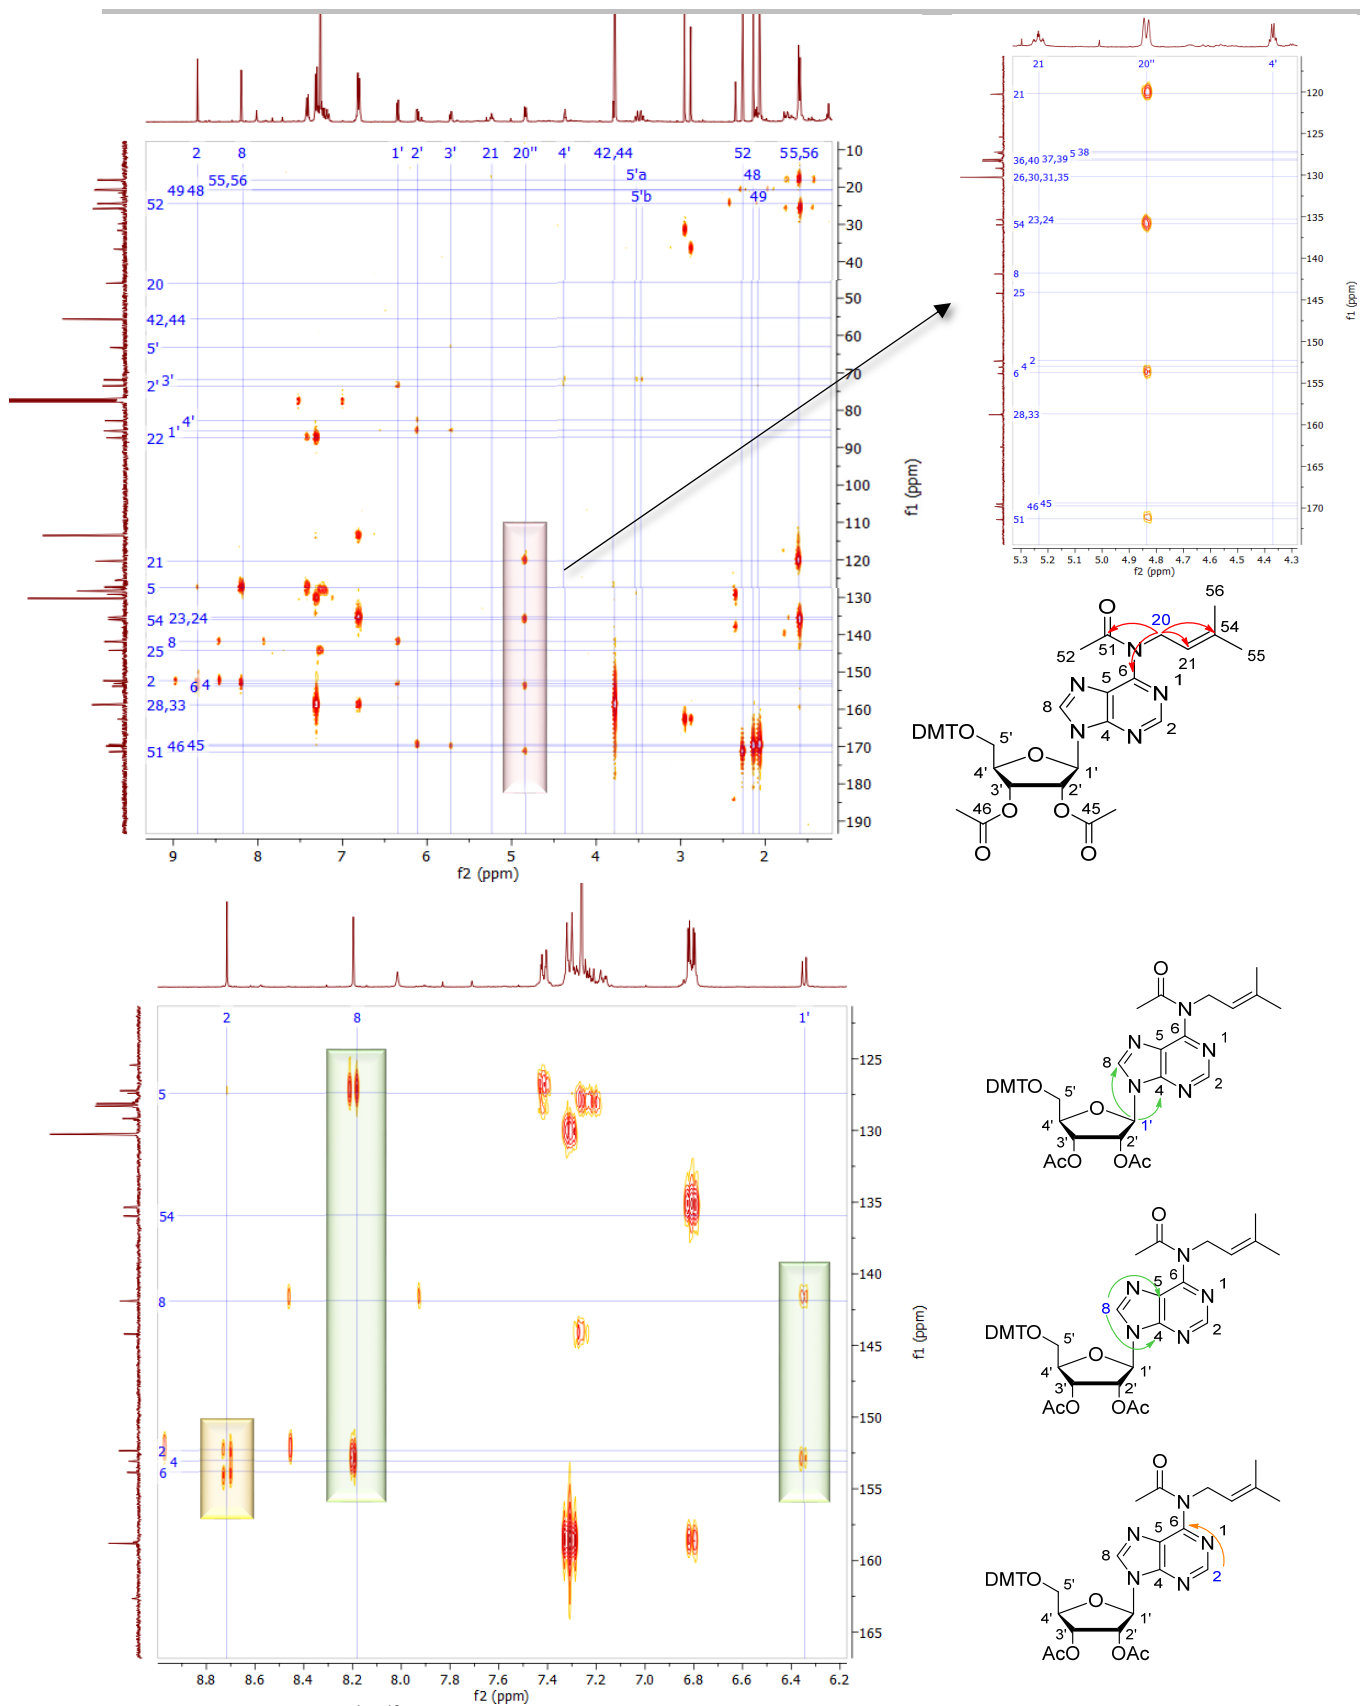

**Figure S16.** Excerpts of  $^1\text{H}$ ,  $^{13}\text{C}$ -HMBC spectrum for **4** confirming the assignment of N6 alkylation.

## SUPPORTING INFORMATION

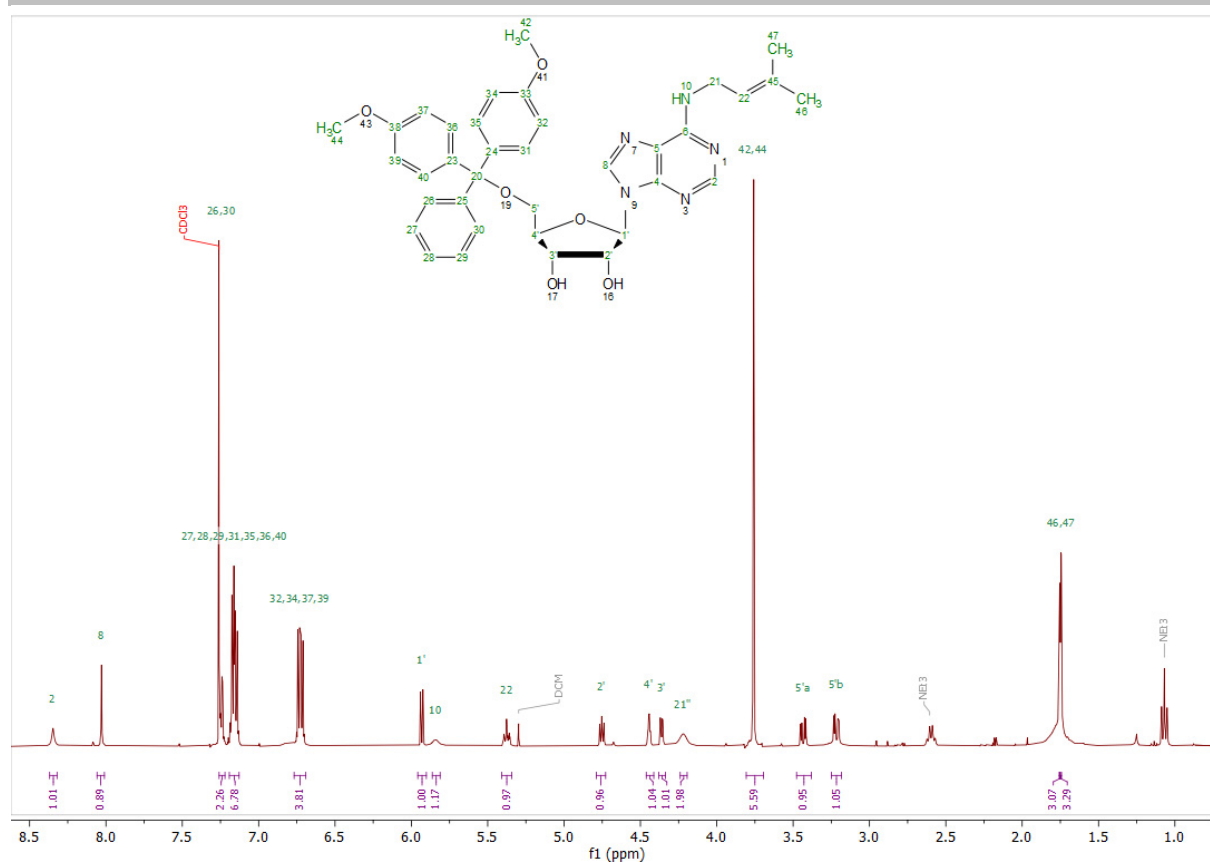Figure S17.  $^1\text{H-NMR}$  spectrum for 5.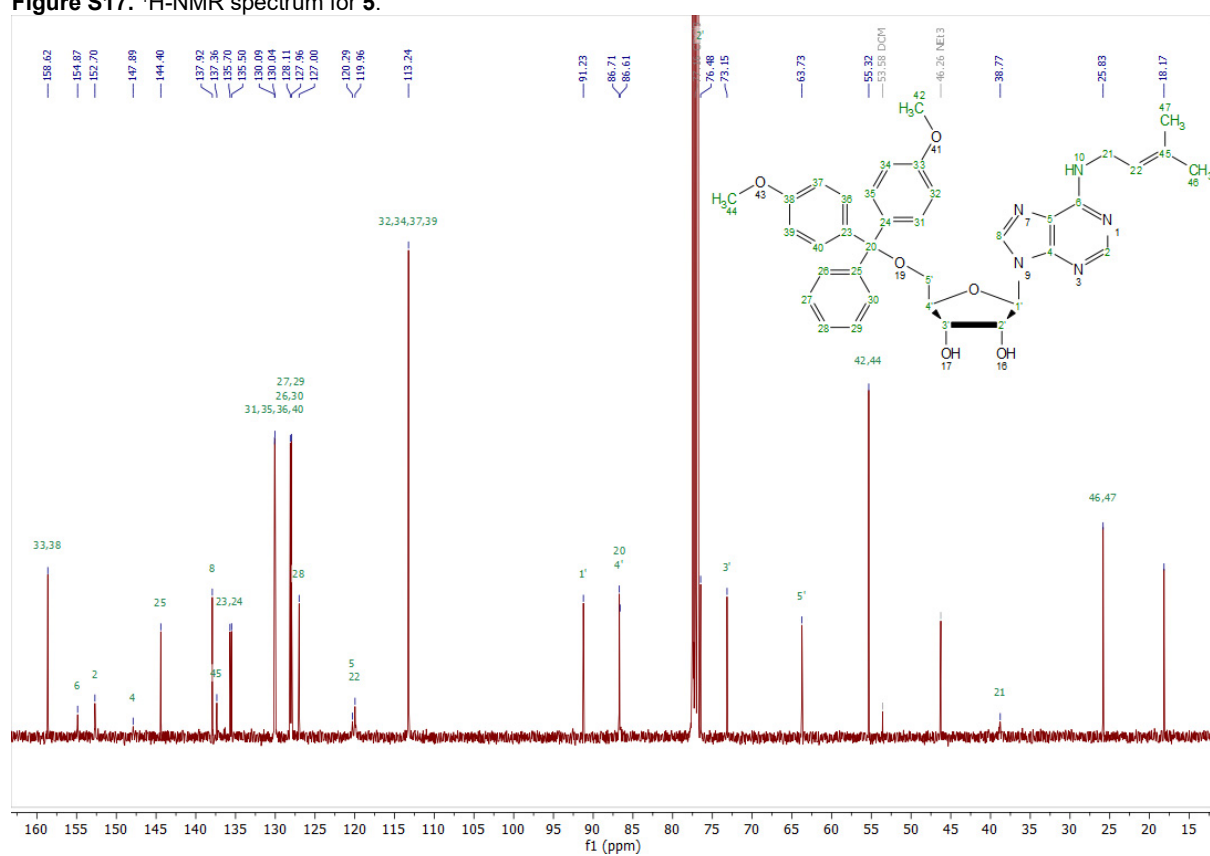Figure S18.  $^{13}\text{C-NMR}$  spectrum for 5.

## SUPPORTING INFORMATION

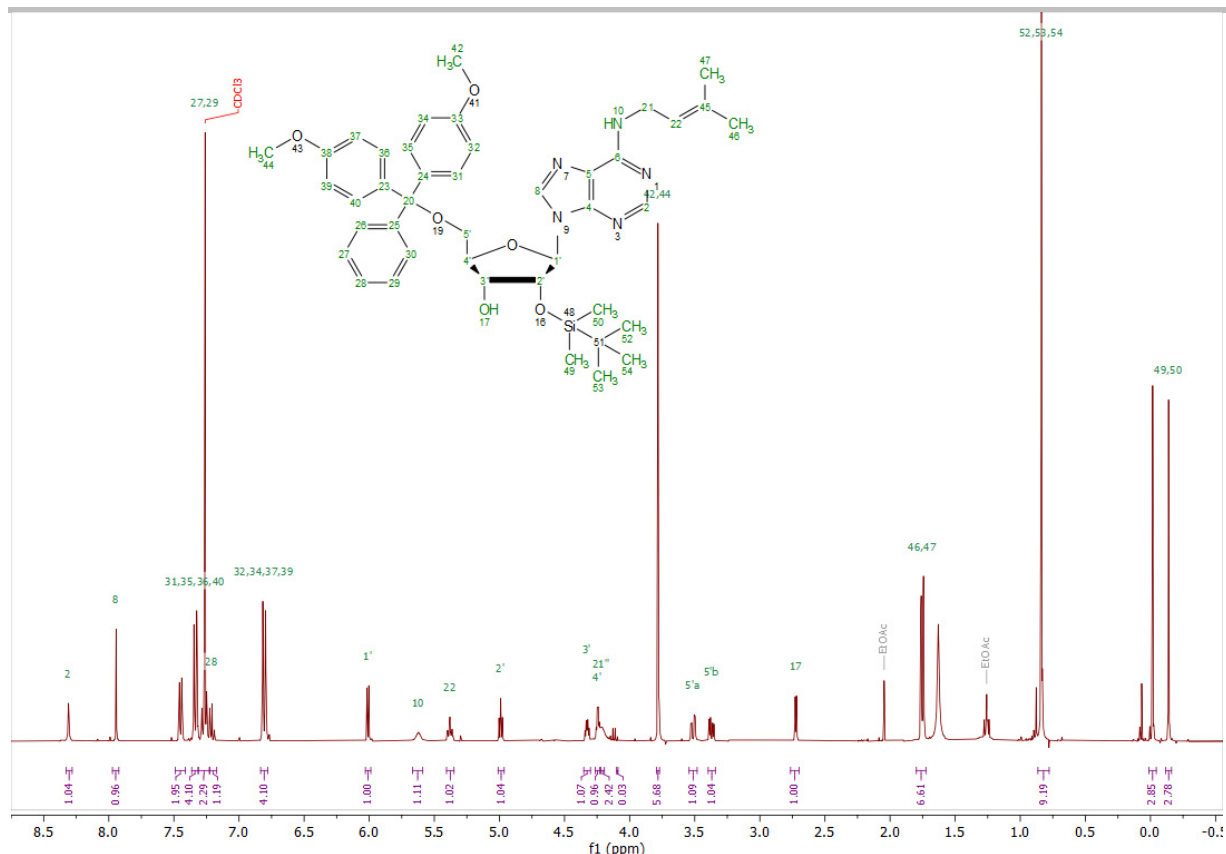Figure S19.  $^1\text{H-NMR}$  spectrum for **6**.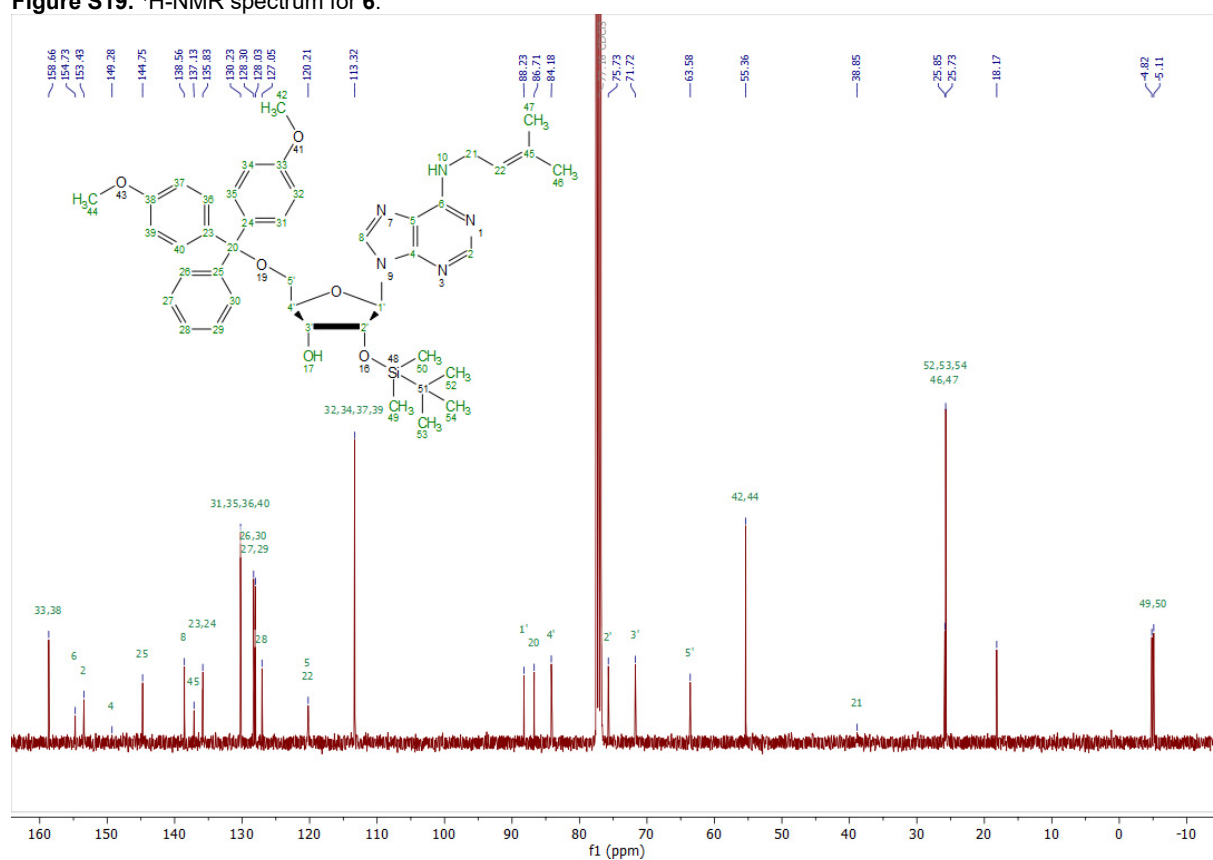Figure S20.  $^{13}\text{C-NMR}$  spectrum for **6**.

## SUPPORTING INFORMATION

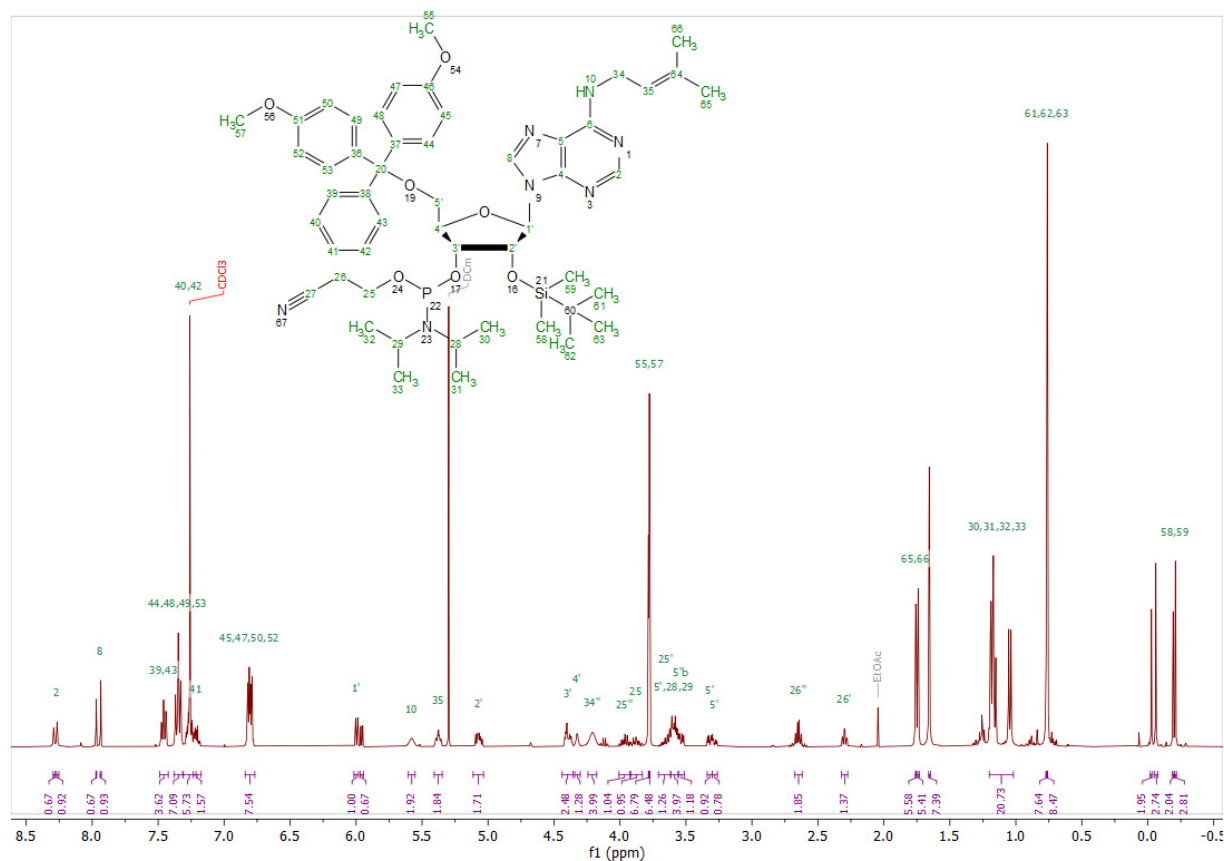Figure S21.  $^1\text{H-NMR}$  spectrum for **1**.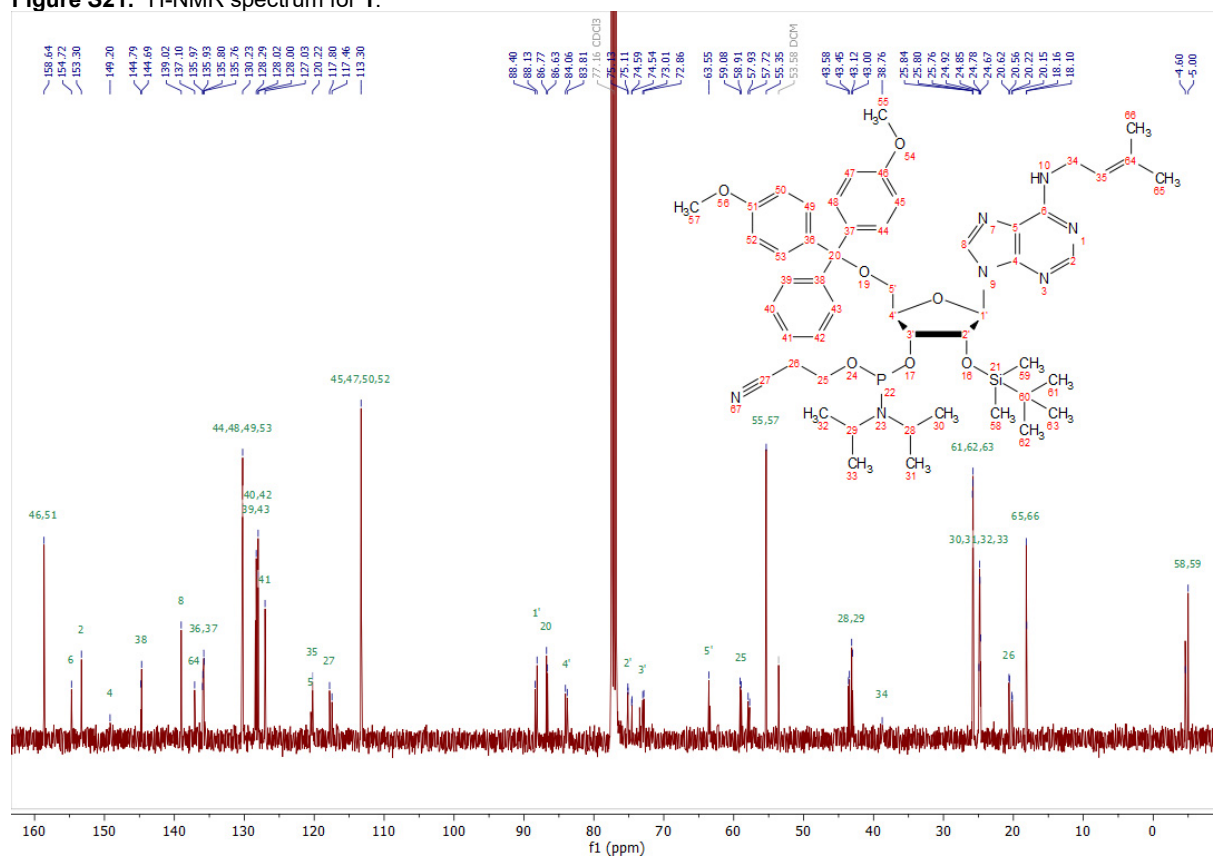Figure S22.  $^{13}\text{C-NMR}$  spectrum for **1**.



## SUPPORTING INFORMATION

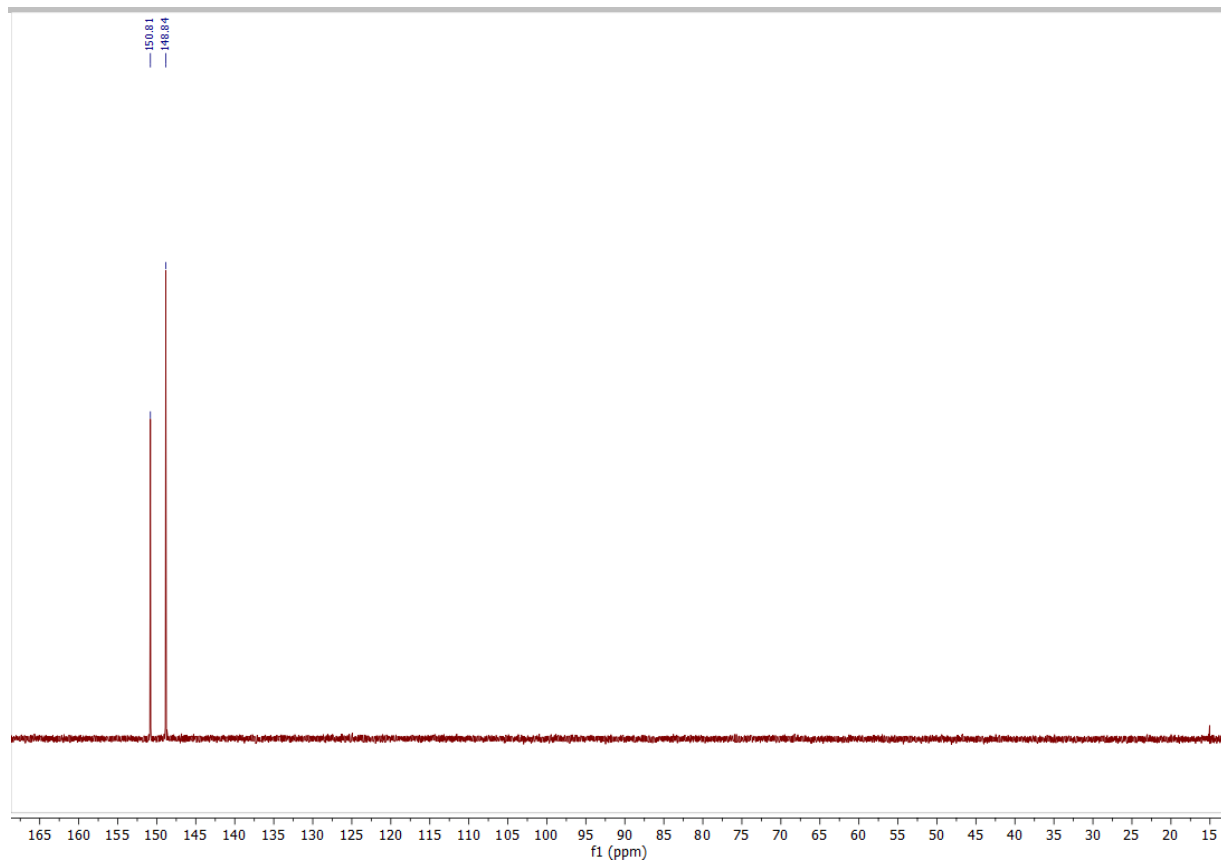Figure S23.  $^{31}\text{P}$ -NMR spectrum for **1**.

## Acquisition Parameter

|             |            |                 |           |                  |           |
|-------------|------------|-----------------|-----------|------------------|-----------|
| Source Type | ESI        | Ion Polarity    | Positive  | Set Nebulizer    | 0.3 Bar   |
| Focus       | Not active | Set Funnel 1 RF | 200.0 Vpp | Set Dry Heater   | 200 °C    |
| Scan Begin  | 50 m/z     | Set Funnel 2 RF | 300.0 Vpp | Set Dry Gas      | 3.5 l/min |
| Scan End    | 4000 m/z   | Set Hexapole RF | 400.0 Vpp | Set Divert Valve | Source    |

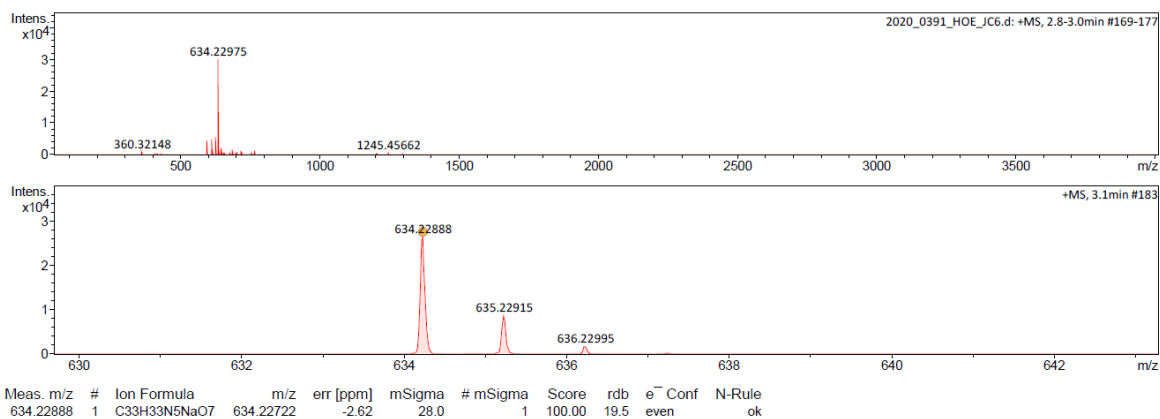Figure S24. ESI(+)-MS spectrum for **2**.

## SUPPORTING INFORMATION

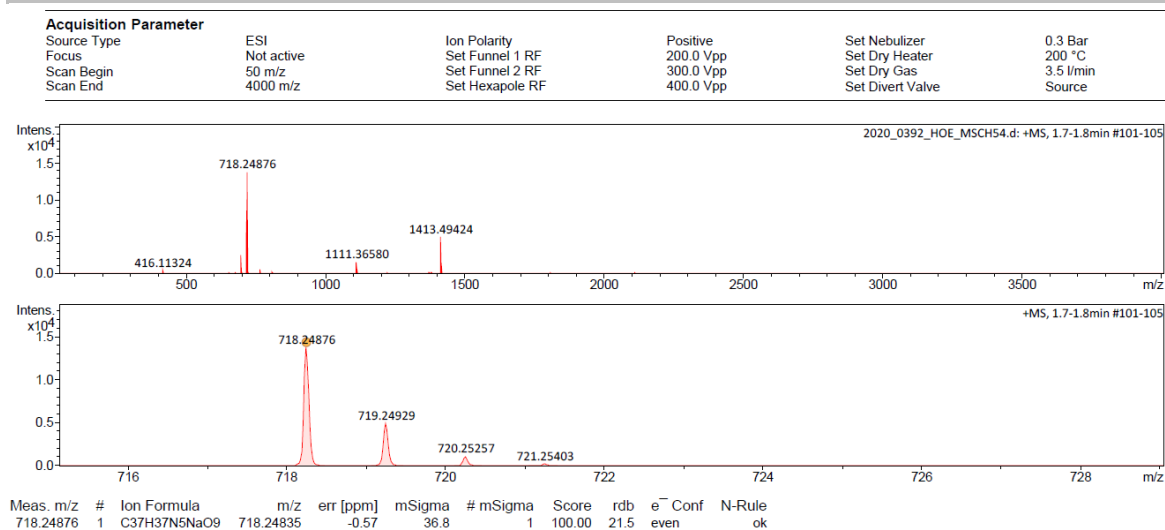

Figure S25. ESI(+)-MS spectrum for 3.

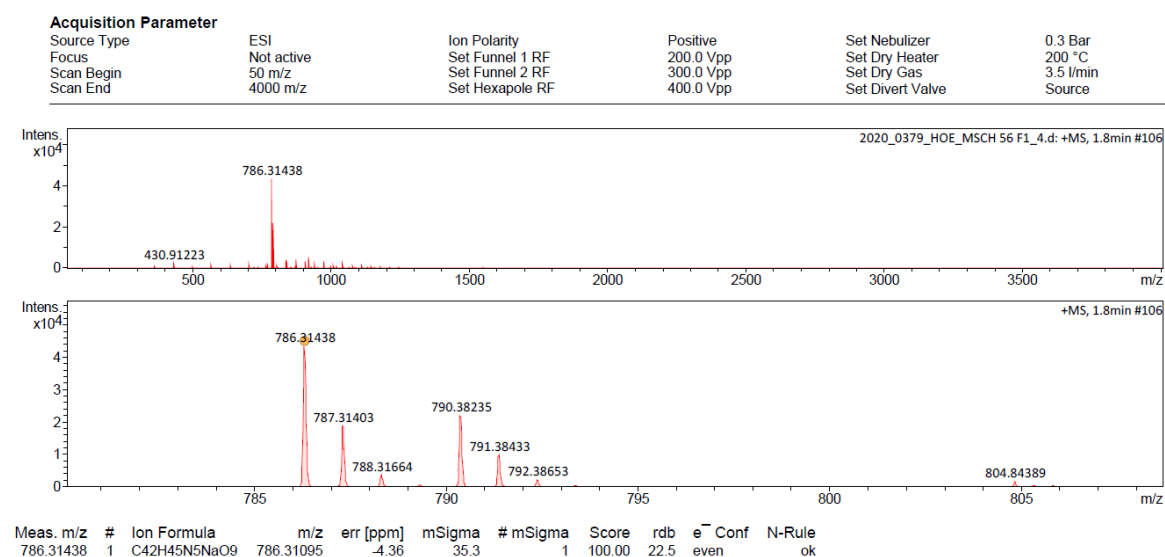

Figure S26. ESI(+)-MS spectrum for 4.

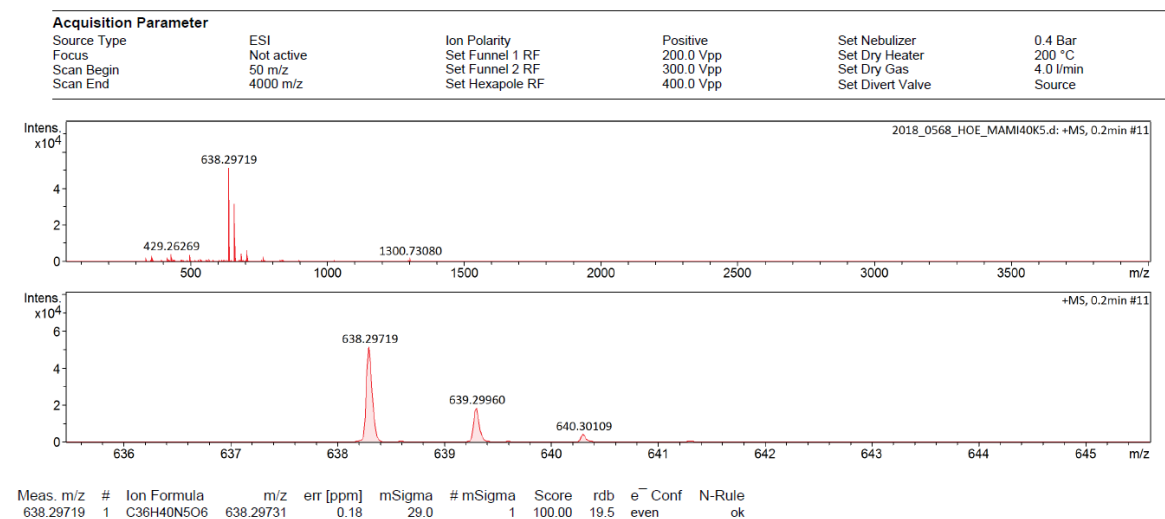

Figure S27. ESI(+)-MS spectrum for 5.

## SUPPORTING INFORMATION

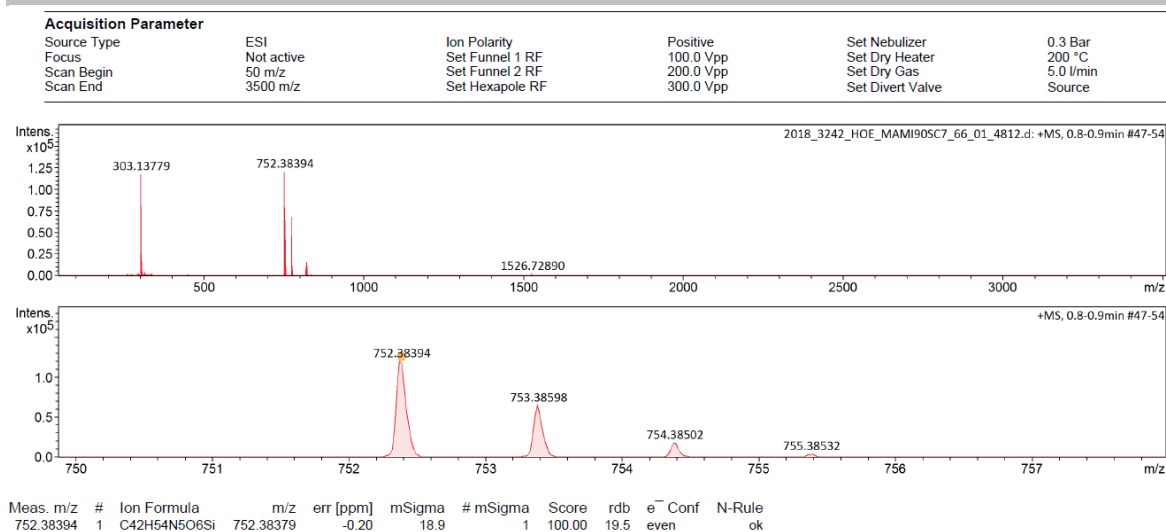

Figure S28. ESI(+)-MS spectrum for 6.

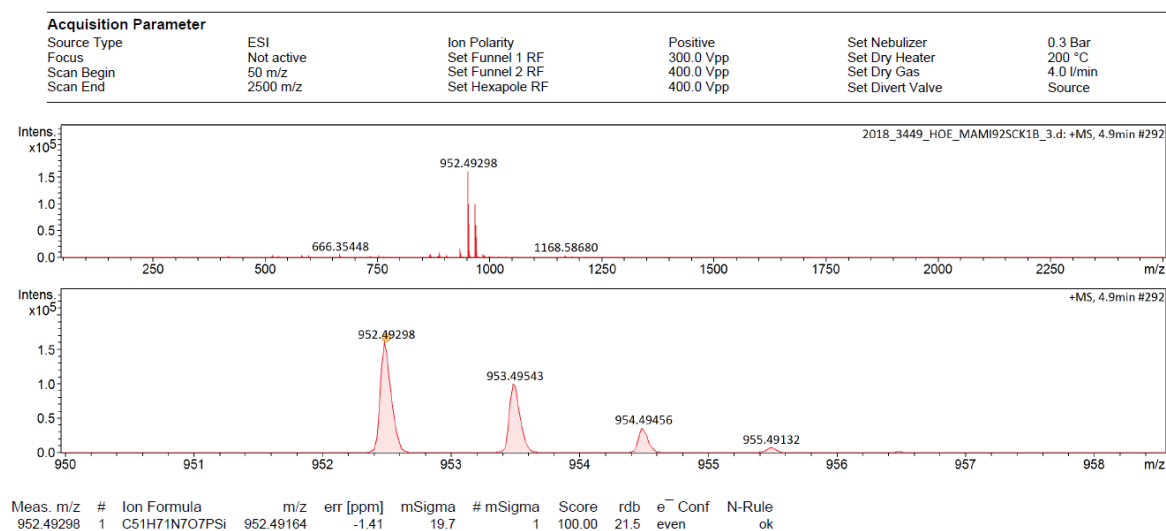

Figure S29. ESI(+)-MS spectrum for 1.

## SUPPORTING INFORMATION

## 9. Alignment of NGS reads for sequence logos

**Alignment of 54 AB08 sequence variants used for the sequence logo in Figure 3f**using msa (Bioconductor R package) for multiple sequence alignment<sup>[8]</sup>

```

GGGCAG-CCA GTGGTACGTT --
GGGCAG-CCA GTGG-ACGTT --
GGGCAG-CCA GTGGTACGTT T-
GGGCAG-CCA GTGGTACGTG --
GGGCAG-CCA GTGGTACGTA --
GGGTAG-CCA GTGG-ACGTC TT
GGGTAG-CCA GTGG-ACGTC T-
GGGTAG-CCA GTGG-ACGTC TG
GGGTAG-CCA GTGG-ACGTC TA
GGGTAG-CCA GTGG-ACGTG --
GGGTAG-CCA GTGG-ACGTG T-
GGGTATTCCA GTGG-ACGTT --
GGGTATTCCA GTGGTACGTT --
GGGTATACCA GTGG-ACGTT --
GGGTAATCCA GTGG-ACGTT --
GGGTAATCCA GTGG-ACGTG --
GGGTAG-CCA GTGG-ACGTA --
GGGTAG-CCA GTGGTACGTG --
GGGTAG-CCA GTGGATCGTT --
GGGTAG-CCA GTGGATCGTG --
GGGTAG-CCA GTGG-ACGTT T-
GGGTAG-CCA GTGG-ACGTT TT
GGGTAG-CCA GTGG-ACGTT TG
GGGTAG-CCA GTGG-ACGTT TA
GGGTAG-CCA GTGG-ACGTT A-
GGGTAG-CCA GTGG-ACGTT --
GGGTAG-CCA GTGG-ACGTT G-
GGGTAG-CCA GTGGTACGTT --
GGGGAG-CCA GTGGTACGTT --
GGGAAG-CCA GTGGTACGTG --
GGGAAG-CCA GTGG-ACGTG --
GGGAAG-CCA GTGG-ACGTA --
GGGAAG-CCA GTGG-ACGTA T-
GGGAAG-CCA GTGGTACGTA --
GGGAAG-CCA GTGGTACGTC --
GGGAAG-CCA GTGG-ACGTT --
GGGAAG-CCA GTGG-ACGTT G-
GGGAAG-CCA GTGG-ACGTT T-
GGGAAG-CCA GTGGTACGTT T-
-GGGAATCCA GTGGTACGTT --
-GGAAAGCCA GTGGTACGTT --
GGGGAAGCCA GTGGTACGTT --
--GGAAGCCA GTGGTACGTT --
-GGGAAGCCA GTGGTACGTT --
GGGAAG-CCG GTGGTACGTT --
-GGGAGGCCA GTGGTACGTT --
GGGAAG-CCA GAGGTACGTT --
GGGAAG-CCA GTGGTACGCT --
GGGAAG-CCA GTGGTGCGTT --
GGGAAG-CCA GCGGTACGTT --
GGGTTGTCCA GCGGTACGTT --
GGGTTGCCCA GCGGTACGTT --
GGGATGCCCA GCGGTACGTT --
GGGATGTCCA GCGGTACGTT --

```

## SUPPORTING INFORMATION

## Alignment of 45 AC17 sequence variants used for the sequence logo in Figure 4f

```

-GGGAC-CCA GCTGGACGTT TG
-GGGAC-CCA GCTGGACGTT T-
-GGGAC-CCA GCTGGACGTT TA
-GGGAC-CCA GCTGGACGTT AT
-GGGAC-CCA GCTGGACGTT --
-GGGAC-CCA GCTGGACGTT TT
-GGGAC-CCA GCCGGACGTT TG
-GGGAC-CCA GCCGGACGTT T-
-GGGAC-CCA GCCGGACGTT TA
-GGGAC-CCA GCCGGACGTT TT
-GGGAC-CCA GCCGGACGTT G-
-GGGAC-CCA GCCGGACGTT --
-GGGAC-CCA GCCGGACGTT A-
-GGGACTCCA GCCGGACGTT --
-GGGACTCCA GCCGGTCGTT --
-GGGACTCCA GCCGGACGTG --
-GGGAC-CCA GCCGGACGTG --
-GGGAC-CCA GCCGGACGTC TT
-GGGAC-CCA GCCGGACGTA --
-GGGAC-CCA GCTGGACGTA --
--GGGCTCCA GCTGGTCGTC TA
--GGGCTCCA GCTGGACGTC TT
--GGGCCCCA GCTGGACGTC TA
-GGGACTCCA GCTGGTCGTT --
GGGAT-TCCA GCTGGACGTA --
GGGATATCCA GCTGGACGTA --
GGGAT-TCCA GCTGGACGTT --
GGGAT-TCCA GCCGGACGTA --
GGGATATCCA GCCGGACGTA --
GGGAT-TCCA GCCGGACGTG --
GGGAT-TCCA GCCGGACGTT --
-GGGTCTCCA GCTGGTCGTA --
-GGGTCTCCA GCCGGTCGTA --
-GGGTCTCCA GCTGGTCGTT --
-GGGTCTCCA GCTGGCCGTT --
-GGGTCTCCA GCTGGACGTT --
-GGGTCTCCA GCTGGACGTG --
-GGGTCTCCA GCCGGACGTA --
-GGGTCTCCA GCCGGACGTG --
-GGGTCTCCA GCCGGACGTT --
-GGGCCTCCA GCTGGACGTA --
-GGGTAGCCA G-TGGACGTT A-
-GGGTATCCA G-TGGACGTT --
-GGTTATCCA GCTGGACGTT --
-GGGTATCCA G-TGGACGTA --

```

## 10. References

- [1] S. Pitsch, P. A. Weiss, L. Jenny, A. Stutz, X. Wu, *Helv. Chim. Acta* **2001**, *84*, 3773-3795.
- [2] V. I. Tararov, S. V. Kolyachkina, C. S. Alexeev, S. N. Mikhailov, *Synthesis* **2011**, *2011*, 2483-2489.
- [3] V. I. Tararov, A. Tijisma, S. V. Kolyachkina, V. E. Oslovsky, J. Neyts, M. S. Drenichev, P. Leysen, S. N. Mikhailov, *Eur. J. Med. Chem.* **2015**, *90*, 406-413.
- [4] G. H. Hakimelahi, Z. A. Proba, K. K. Ogilvie, *Tet. Lett.* **1981**, *22*, 4775-4778.
- [5] R. Schmieder, R. Edwards, *Bioinformatics* **2011**, *27*, 863-864.
- [6] M. Martin, *EMBNET journal; Vol 17, No 1: Next Generation Sequencing Data Analysis* **2011**. DOI: 10.14806/ej.17.1.200.
- [7] K. K. Alam, J. L. Chang, D. H. Burke, *Molecular Therapy - Nucleic Acids* **2015**, *4*.
- [8] U. Bodenhofer, E. Bonatesta, C. Horejš-Kainrath, S. Hochreiter, *Bioinformatics* **2015**, *31*, 3997-3999.
- [9] O. Wagih, *Bioinformatics* **2017**, *33*, 3645-3647.
